# Supplementary material for: Human Papillomavirus (HPV) Vaccine Coverage and Confidence in Italy: A Nationwide Cross-Sectional Study, the OBVIOUS Project
Source: MDPI journal article supplement (doi:10.3390/vaccines12020187), 2024-02-12
Supplement: s1 [file s1]

## SUPPLEMENTARY TABLES

**Table S1.** General information about vaccines among participants who answered about their own HPV vaccine uptake, overall and by NUTS.

| Characteristic                            | Italy<br>( <i>n</i> = 3160) | Northwestern<br>Italy<br>( <i>n</i> = 776) | Northeastern<br>Italy<br>( <i>n</i> = 637) | Central Italy<br>( <i>n</i> = 634) | Southern Italy<br>( <i>n</i> = 736) | Insular Italy<br>( <i>n</i> = 377) |
|-------------------------------------------|-----------------------------|--------------------------------------------|--------------------------------------------|------------------------------------|-------------------------------------|------------------------------------|
| Place where you prevalently got vaccines  |                             |                                            |                                            |                                    |                                     |                                    |
| Vaccine Hub                               | 2038 (64.5%)                | 542 (69.8%)                                | 381 (59.8%)                                | 385 (60.7%)                        | 484 (65.8%)                         | 246 (65.3%)                        |
| Hospital                                  | 653 (20.7%)                 | 135 (17.4%)                                | 175 (27.5%)                                | 140 (22.1%)                        | 130 (17.7%)                         | 73 (19.4%)                         |
| Family doctor                             | 310 (9.8%)                  | 63 (8.1%)                                  | 43 (6.8%)                                  | 81 (12.8%)                         | 81 (11.0%)                          | 42 (11.1%)                         |
| Pharmacy                                  | 89 (2.8%)                   | 23 (3.0%)                                  | 19 (3.0%)                                  | 16 (2.5%)                          | 22 (3.0%)                           | 9 (2.4%)                           |
| Workplace                                 | 36 (1.1%)                   | 7 (0.9%)                                   | 9 (1.4%)                                   | 9 (1.4%)                           | 8 (1.1%)                            | 3 (0.8%)                           |
| Home                                      | 34 (1.1%)                   | 6 (0.8%)                                   | 10 (1.6%)                                  | 3 (0.5%)                           | 11 (1.5%)                           | 4 (1.1%)                           |
| Favorite place to get vaccines            |                             |                                            |                                            |                                    |                                     |                                    |
| Vaccine Hub                               | 1187 (37.6%)                | 294 (37.9%)                                | 233 (36.6%)                                | 221 (34.9%)                        | 289 (39.3%)                         | 150 (39.8%)                        |
| Hospital                                  | 736 (23.3%)                 | 175 (22.6%)                                | 170 (26.7%)                                | 163 (25.7%)                        | 150 (20.4%)                         | 78 (20.7%)                         |
| Family doctor                             | 697 (22.1%)                 | 158 (20.4%)                                | 127 (19.9%)                                | 162 (25.6%)                        | 157 (21.3%)                         | 93 (24.7%)                         |
| Pharmacy                                  | 242 (7.7%)                  | 78 (10.1%)                                 | 46 (7.2%)                                  | 37 (5.8%)                          | 54 (7.3%)                           | 27 (7.2%)                          |
| Home                                      | 216 (6.8%)                  | 46 (5.9%)                                  | 39 (6.1%)                                  | 35 (5.5%)                          | 74 (10.1%)                          | 22 (5.8%)                          |
| Workplace                                 | 82 (2.6%)                   | 25 (3.2%)                                  | 22 (3.5%)                                  | 16 (2.5%)                          | 12 (1.6%)                           | 7 (1.9%)                           |
| Friends and family's views on vaccination |                             |                                            |                                            |                                    |                                     |                                    |
| Very unfavorable                          | 121 (3.8%)                  | 30 (3.9%)                                  | 35 (5.5%)                                  | 17 (2.7%)                          | 27 (3.7%)                           | 12 (3.2%)                          |
| Unfavorable                               | 96 (3.0%)                   | 28 (3.6%)                                  | 13 (2.0%)                                  | 18 (2.8%)                          | 28 (3.8%)                           | 9 (2.4%)                           |
| Quite unfavorable                         | 253 (8.0%)                  | 59 (7.6%)                                  | 59 (9.3%)                                  | 43 (6.8%)                          | 58 (7.9%)                           | 34 (9.0%)                          |
| Quite favorable                           | 990 (31.3%)                 | 227 (29.3%)                                | 190 (29.8%)                                | 214 (33.8%)                        | 232 (31.5%)                         | 127 (33.7%)                        |
| Favorable                                 | 909 (28.8%)                 | 217 (28.0%)                                | 190 (29.8%)                                | 174 (27.4%)                        | 218 (29.6%)                         | 110 (29.2%)                        |
| Very favorable                            | 791 (25.0%)                 | 215 (27.7%)                                | 150 (23.5%)                                | 168 (26.5%)                        | 173 (23.5%)                         | 85 (22.5%)                         |

*Notes:* Piedmont, Aosta Valley, Lombardy, and Liguria constitute Northwestern Italy; Trentino-South Tyrol, Veneto, Friuli-Venezia Giulia, and Emilia-Romagna constitute Northeastern Italy; Tuscany, Umbria, Marche, and Lazio constitute Central Italy; Abruzzo, Molise, Campania, Apulia, Basilicata, and Calabria constitute Southern Italy; Sicily and Sardinia constitute Insular Italy.

*HPV*, human papillomavirus; *NUTS*, Nomenclature of Territorial Units for Statistics.

**Table S2.** HPV vaccine uptake in target groups based on age and gender, overall and by NUTS;  
if the answer is no, the participants are asked whether or not they would get the vaccine.

|                                      | All           | Yes, I did  | No, but I would | No, and I would not |
|--------------------------------------|---------------|-------------|-----------------|---------------------|
| Female participants aged $\geq 26$ y |               |             |                 |                     |
| Italy                                | 2109 (100.0%) | 457 (21.7%) | 1203 (57.0%)    | 449 (21.3%)         |
| Northwestern Italy                   | 551 (100.0%)  | 109 (19.8%) | 324 (58.8%)     | 118 (21.4%)         |
| Northeastern Italy                   | 419 (100.0%)  | 115 (27.4%) | 214 (51.1%)     | 90 (21.5%)          |
| Central Italy                        | 429 (100.0%)  | 79 (18.4%)  | 258 (60.1%)     | 92 (21.4%)          |
| Southern Italy                       | 434 (100.0%)  | 103 (23.7%) | 232 (53.5%)     | 99 (22.8%)          |
| Insular Italy                        | 276 (100.0%)  | 51 (18.5%)  | 175 (63.4%)     | 50 (18.1%)          |
| Male participants aged 18–25 y       |               |             |                 |                     |
| Italy                                | 457 (100.0%)  | 174 (38.1%) | 177 (38.7%)     | 106 (23.2%)         |
| Northwestern Italy                   | 94 (100.0%)   | 41 (43.6%)  | 35 (37.2%)      | 18 (19.1%)          |
| Northeastern Italy                   | 95 (100.0%)   | 45 (47.4%)  | 26 (27.4%)      | 24 (25.3%)          |
| Central Italy                        | 82 (100.0%)   | 34 (41.5%)  | 33 (40.2%)      | 15 (18.3%)          |
| Southern Italy                       | 143 (100.0%)  | 40 (28.0%)  | 70 (49.0%)      | 33 (23.1%)          |
| Insular Italy                        | 43 (100.0%)   | 14 (32.6%)  | 13 (30.2%)      | 16 (37.2%)          |
| Female participants aged 18–25 y     |               |             |                 |                     |
| Italy                                | 594 (100.0%)  | 480 (80.8%) | 81 (13.6%)      | 33 (5.6%)           |
| Northwestern Italy                   | 131 (100.0%)  | 109 (83.2%) | 15 (11.5%)      | 7 (5.3%)            |
| Northeastern Italy                   | 123 (100.0%)  | 105 (85.4%) | 10 (8.1%)       | 8 (6.5%)            |
| Central Italy                        | 123 (100.0%)  | 99 (80.5%)  | 18 (14.6%)      | 6 (4.9%)            |
| Southern Italy                       | 159 (100.0%)  | 124 (78.0%) | 27 (17.0%)      | 8 (5.0%)            |
| Insular Italy                        | 58 (100.0%)   | 43 (74.1%)  | 11 (19.0%)      | 4 (6.9%)            |
| Male offspring aged 9–11 y           |               |             |                 |                     |
| Italy                                | 226 (100.0%)  | 91 (40.3%)  | 96 (42.5%)      | 39 (17.3%)          |
| Northwestern Italy                   | 61 (100.0%)   | 28 (45.9%)  | 22 (36.1%)      | 11 (18.0%)          |
| Northeastern Italy                   | 47 (100.0%)   | 20 (42.6%)  | 17 (36.2%)      | 10 (21.3%)          |
| Central Italy                        | 47 (100.0%)   | 14 (29.8%)  | 25 (53.2%)      | 8 (17.0%)           |
| Southern Italy                       | 50 (100.0%)   | 15 (30.0%)  | 26 (52.0%)      | 9 (18.0%)           |
| Insular Italy                        | 21 (100.0%)   | 14 (66.7%)  | 6 (28.6%)       | 1 (4.8%)            |
| Female offspring aged 9–11 y         |               |             |                 |                     |
| Italy                                | 201 (100.0%)  | 80 (39.8%)  | 100 (49.8%)     | 21 (10.4%)          |
| Northwestern Italy                   | 58 (100.0%)   | 26 (44.8%)  | 26 (44.8%)      | 6 (10.3%)           |
| Northeastern Italy                   | 28 (100.0%)   | 13 (46.4%)  | 12 (42.9%)      | 3 (10.7%)           |
| Central Italy                        | 35 (100.0%)   | 12 (34.3%)  | 19 (54.3%)      | 4 (11.4%)           |
| Southern Italy                       | 56 (100.0%)   | 21 (37.5%)  | 31 (55.4%)      | 4 (7.1%)            |
| Insular Italy                        | 24 (100.0%)   | 8 (33.3%)   | 12 (50.0%)      | 4 (16.7%)           |
| Male offspring aged 12–17 y          |               |             |                 |                     |
| Italy                                | 431 (100.0%)  | 220 (51.0%) | 131 (30.4%)     | 80 (18.6%)          |
| Northwestern Italy                   | 137 (100.0%)  | 69 (50.4%)  | 37 (27.0%)      | 31 (22.6%)          |
| Northeastern Italy                   | 71 (100.0%)   | 46 (64.8%)  | 14 (19.7%)      | 11 (15.5%)          |
| Central Italy                        | 79 (100.0%)   | 41 (51.9%)  | 25 (31.6%)      | 13 (16.5%)          |
| Southern Italy                       | 97 (100.0%)   | 45 (46.4%)  | 33 (34.0%)      | 19 (19.6%)          |
| Insular Italy                        | 47 (100.0%)   | 19 (40.4%)  | 22 (46.8%)      | 6 (12.8%)           |
| Female offspring aged 12–17 y        |               |             |                 |                     |
| Italy                                | 408 (100.0%)  | 299 (73.3%) | 69 (16.9%)      | 40 (9.8%)           |
| Northwestern Italy                   | 127 (100.0%)  | 99 (78.0%)  | 13 (10.2%)      | 15 (11.8%)          |
| Northeastern Italy                   | 61 (100.0%)   | 43 (70.5%)  | 11 (18.0%)      | 7 (11.5%)           |
| Central Italy                        | 71 (100.0%)   | 48 (67.6%)  | 16 (22.5%)      | 7 (9.9%)            |
| Southern Italy                       | 93 (100.0%)   | 73 (78.5%)  | 14 (15.1%)      | 6 (6.5%)            |

|               |             |            |            |          |
|---------------|-------------|------------|------------|----------|
| Insular Italy | 56 (100.0%) | 36 (64.3%) | 15 (26.8%) | 5 (8.9%) |
|---------------|-------------|------------|------------|----------|

---

*Notes:* Females include non-binary people and participants who did not disclose their gender identity. Information about offspring was provided by the parents of the children. Piedmont, Aosta Valley, Lombardy, and Liguria constitute Northwestern Italy; Trentino-South Tyrol, Veneto, Friuli-Venezia Giulia, and Emilia-Romagna constitute Northeastern Italy; Tuscany, Umbria, Marche, and Lazio constitute Central Italy; Abruzzo, Molise, Campania, Apulia, Basilicata, and Calabria constitute Southern Italy; Sicily and Sardinia constitute Insular Italy.

*HPV*, human papillomavirus; *NUTS*, Nomenclature of Territorial Units for Statistics.

**Table S3.** Information about HPV vaccination among participants who answered about their own HPV vaccine uptake, by target group based on age and gender.

| Characteristic                                                                     | Male participants<br>aged 18–25 y<br>(n = 457) | Female participants<br>aged 18–25 y<br>(n = 594) | Female participants<br>aged ≥26 y<br>(n = 2109) |
|------------------------------------------------------------------------------------|------------------------------------------------|--------------------------------------------------|-------------------------------------------------|
| Worry about getting HPV infection                                                  |                                                |                                                  |                                                 |
| Not worried                                                                        | 142 (31.1%)                                    | 106 (17.8%)                                      | 349 (16.5%)                                     |
| A little worried                                                                   | 224 (49.0%)                                    | 293 (49.3%)                                      | 933 (44.2%)                                     |
| Quite worried                                                                      | 80 (17.5%)                                     | 165 (27.8%)                                      | 639 (30.3%)                                     |
| Very worried                                                                       | 11 (2.4%)                                      | 30 (5.1%)                                        | 188 (8.9%)                                      |
| Perception of the safety of HPV vaccine                                            |                                                |                                                  |                                                 |
| Very safe                                                                          | 143 (31.3%)                                    | 204 (34.3%)                                      | 506 (24.0%)                                     |
| Quite safe                                                                         | 265 (58.0%)                                    | 348 (58.6%)                                      | 1291 (61.2%)                                    |
| Quite unsafe                                                                       | 44 (9.6%)                                      | 35 (5.9%)                                        | 254 (12.0%)                                     |
| Very unsafe                                                                        | 5 (1.1%)                                       | 7 (1.2%)                                         | 58 (2.8%)                                       |
| Belief about having higher priority for HPV vaccination                            |                                                |                                                  |                                                 |
| Yes                                                                                | 146 (31.9%)                                    | 435 (73.2%)                                      | 587 (27.8%)                                     |
| No                                                                                 | 108 (23.6%)                                    | 38 (6.4%)                                        | 624 (29.6%)                                     |
| Don't know                                                                         | 203 (44.4%)                                    | 121 (20.4%)                                      | 898 (42.6%)                                     |
| Perception of how easy it is to access healthcare facilities to get an HPV vaccine |                                                |                                                  |                                                 |
| Very easy                                                                          | 66 (14.4%)                                     | 161 (27.1%)                                      | 266 (12.6%)                                     |
| Quite easy                                                                         | 278 (60.8%)                                    | 344 (57.9%)                                      | 1217 (57.7%)                                    |
| Quite difficult                                                                    | 101 (22.1%)                                    | 74 (12.5%)                                       | 509 (24.1%)                                     |
| Very difficult                                                                     | 12 (2.6%)                                      | 15 (2.5%)                                        | 117 (5.5%)                                      |
| Perception of the affordability of HPV vaccines                                    |                                                |                                                  |                                                 |
| Very affordable                                                                    | 108 (23.6%)                                    | 143 (24.1%)                                      | 311 (14.7%)                                     |
| Quite affordable                                                                   | 261 (57.1%)                                    | 346 (58.2%)                                      | 1120 (53.1%)                                    |
| Little affordable                                                                  | 83 (18.2%)                                     | 89 (15.0%)                                       | 554 (26.3%)                                     |
| Not at all affordable                                                              | 5 (1.1%)                                       | 16 (2.7%)                                        | 124 (5.9%)                                      |
| Payment for HPV vaccination*                                                       |                                                |                                                  |                                                 |
| Gratis                                                                             | 100 (57.5%)                                    | 363 (75.6%)                                      | 295 (64.6%)                                     |
| For a fee                                                                          | 36 (20.7%)                                     | 33 (6.9%)                                        | 97 (21.2%)                                      |
| Don't remember                                                                     | 38 (21.8%)                                     | 84 (17.5%)                                       | 65 (14.2%)                                      |

\*Restricted to subjects vaccinated against HPV.  
*HPV*, human papillomavirus.

**Table S4.** Information about HPV vaccination among participants who answered about their youngest children's HPV vaccine uptake, by target group based on age and gender.

| Characteristic                                                                     | Male offspring<br>aged 9–11 y<br>(n = 226) | Female offspring<br>aged 9–11 y<br>(n = 201) | Male offspring<br>aged 12–17 y<br>(n = 431) | Female offspring<br>aged 12–17 y<br>(n = 408) |
|------------------------------------------------------------------------------------|--------------------------------------------|----------------------------------------------|---------------------------------------------|-----------------------------------------------|
| Worry about getting HPV infection                                                  |                                            |                                              |                                             |                                               |
| Not worried                                                                        | 30 (13.3%)                                 | 20 (10.0%)                                   | 74 (17.2%)                                  | 54 (13.2%)                                    |
| A little worried                                                                   | 91 (40.3%)                                 | 75 (37.3%)                                   | 200 (46.4%)                                 | 161 (39.5%)                                   |
| Quite worried                                                                      | 89 (39.4%)                                 | 87 (43.3%)                                   | 133 (30.9%)                                 | 150 (36.8%)                                   |
| Very worried                                                                       | 16 (7.1%)                                  | 19 (9.5%)                                    | 24 (5.6%)                                   | 43 (10.5%)                                    |
| Perception of the safety of HPV vaccine                                            |                                            |                                              |                                             |                                               |
| Very safe                                                                          | 48 (21.2%)                                 | 57 (28.4%)                                   | 106 (24.6%)                                 | 96 (23.5%)                                    |
| Quite safe                                                                         | 139 (61.5%)                                | 120 (59.7%)                                  | 253 (58.7%)                                 | 265 (65.0%)                                   |
| Quite unsafe                                                                       | 28 (12.4%)                                 | 15 (7.5%)                                    | 52 (12.1%)                                  | 33 (8.1%)                                     |
| Very unsafe                                                                        | 11 (4.9%)                                  | 9 (4.5%)                                     | 20 (4.6%)                                   | 14 (3.4%)                                     |
| Belief about having higher priority for HPV vaccination                            |                                            |                                              |                                             |                                               |
| Yes                                                                                | 116 (51.3%)                                | 131 (65.2%)                                  | 246 (57.1%)                                 | 327 (80.1%)                                   |
| No                                                                                 | 44 (19.5%)                                 | 22 (10.9%)                                   | 60 (13.9%)                                  | 22 (5.4%)                                     |
| Don't know                                                                         | 66 (29.2%)                                 | 48 (23.9%)                                   | 125 (29.0%)                                 | 59 (14.5%)                                    |
| Perception of how easy it is to access healthcare facilities to get an HPV vaccine |                                            |                                              |                                             |                                               |
| Very easy                                                                          | 56 (24.8%)                                 | 52 (25.9%)                                   | 94 (21.8%)                                  | 114 (27.9%)                                   |
| Quite easy                                                                         | 122 (54.0%)                                | 123 (61.2%)                                  | 266 (61.7%)                                 | 236 (57.8%)                                   |
| Quite difficult                                                                    | 39 (17.3%)                                 | 19 (9.5%)                                    | 47 (10.9%)                                  | 44 (10.8%)                                    |
| Very difficult                                                                     | 9 (4.0%)                                   | 7 (3.5%)                                     | 24 (5.6%)                                   | 14 (3.4%)                                     |
| Perception of the affordability of HPV vaccines                                    |                                            |                                              |                                             |                                               |
| Very affordable                                                                    | 73 (32.3%)                                 | 79 (39.3%)                                   | 128 (29.7%)                                 | 142 (34.8%)                                   |
| Quite affordable                                                                   | 116 (51.3%)                                | 99 (49.3%)                                   | 229 (53.1%)                                 | 213 (52.2%)                                   |
| Little affordable                                                                  | 31 (13.7%)                                 | 21 (10.4%)                                   | 59 (13.7%)                                  | 43 (10.5%)                                    |
| Not at all affordable                                                              | 6 (2.7%)                                   | 2 (1.0%)                                     | 15 (3.5%)                                   | 10 (2.5%)                                     |
| Payment for HPV vaccination*                                                       |                                            |                                              |                                             |                                               |
| Gratis                                                                             | 74 (81.3%)                                 | 67 (83.8%)                                   | 179 (81.4%)                                 | 266 (89.0%)                                   |
| For a fee                                                                          | 13 (14.3%)                                 | 6 (7.5%)                                     | 28 (12.7%)                                  | 20 (6.7%)                                     |
| Don't remember                                                                     | 4 (4.4%)                                   | 7 (8.8%)                                     | 13 (5.9%)                                   | 13 (4.3%)                                     |

\*Restricted to subjects vaccinated against HPV.

HPV, human papillomavirus

**Table S5.** Predictors of HPV vaccine uptake and hesitancy (expressed as delay vs. refusal) among participants who answered on their own behalf ( $n = 3160$ ).

| Characteristic                | Did get the vaccine   |                                  |              | Would get the vaccine |                                  |              | Would not get the vaccine |                                  |             |
|-------------------------------|-----------------------|----------------------------------|--------------|-----------------------|----------------------------------|--------------|---------------------------|----------------------------------|-------------|
|                               | Predicted probability | Discrete difference ( $\Delta$ ) |              | Predicted probability | Discrete difference ( $\Delta$ ) |              | Predicted probability     | Discrete difference ( $\Delta$ ) |             |
|                               |                       | Estimate                         | 95% CI       |                       | Estimate                         | 95% CI       |                           | Estimate                         | 95% CI      |
| Gender                        |                       |                                  |              |                       |                                  |              |                           |                                  |             |
| Male                          | 21.1%                 | Ref.                             |              | 54.6%                 | Ref.                             |              | 24.2%                     | Ref.                             |             |
| Female†                       | 39.5%                 | 18.3*                            | 14.5, 22.2   | 43.6%                 | -11.0*                           | -18.1, -3.9  | 16.9%                     | -7.3*                            | -13.6, -1.1 |
| Age group, y                  |                       |                                  |              |                       |                                  |              |                           |                                  |             |
| 18–25                         | 62.9%                 | Ref.                             |              | 24.2%                 | Ref.                             |              | 13.0%                     | Ref.                             |             |
| 26–32                         | 35.1%                 | -27.8*                           | -34.5, -21.1 | 46.8%                 | 22.7*                            | 15.6, 29.7   | 18.1%                     | 5.1*                             | 0.0, 10.3   |
| 33–44                         | 21.9%                 | -41.0*                           | -47.0, -35.0 | 59.7%                 | 35.5*                            | 29.1, 41.9   | 18.4%                     | 5.5*                             | 0.9, 10.0   |
| 45–59                         | 13.3%                 | -49.6*                           | -55.6, -43.6 | 60.3%                 | 36.2*                            | 29.3, 43.1   | 26.4%                     | 13.4*                            | 8.1, 18.8   |
| NUTS statistical region       |                       |                                  |              |                       |                                  |              |                           |                                  |             |
| Northwestern Italy            | 34.9%                 | Ref.                             |              | 46.3%                 | Ref.                             |              | 18.8%                     | Ref.                             |             |
| Northeastern Italy            | 38.7%                 | 3.8                              | -0.3, 7.8    | 43.1%                 | -3.2                             | -7.7, 1.3    | 18.2%                     | -0.6                             | -3.9, 2.8   |
| Central Italy                 | 32.6%                 | -2.3                             | -6.2, 1.6    | 48.8%                 | 2.5                              | -2.0, 6.9    | 18.6%                     | -0.2                             | -3.5, 3.2   |
| Southern Italy                | 35.7%                 | 0.8                              | -3.1, 4.6    | 44.8%                 | -1.5                             | -5.9, 2.8    | 19.5%                     | 0.7                              | -2.5, 4.0   |
| Insular Italy                 | 32.8%                 | -2.2                             | -6.8, 2.5    | 49.7%                 | 3.4                              | -1.8, 8.7    | 17.5%                     | -1.3                             | -5.1, 2.5   |
| Degree of urbanization‡       |                       |                                  |              |                       |                                  |              |                           |                                  |             |
| City                          | 34.0%                 | Ref.                             |              | 47.1%                 | Ref.                             |              | 18.9%                     | Ref.                             |             |
| Town or suburb                | 35.9%                 | 1.9                              | -1.0, 4.8    | 46.0%                 | -1.1                             | -4.4, 2.1    | 18.1%                     | -0.7                             | -3.2, 1.7   |
| Rural area                    | 35.6%                 | 1.5                              | -2.6, 5.7    | 45.0%                 | -2.1                             | -6.8, 2.5    | 19.5%                     | 0.6                              | -2.9, 4.1   |
| Educational attainment        |                       |                                  |              |                       |                                  |              |                           |                                  |             |
| Academic/Post-graduate degree | 35.2%                 | Ref.                             |              | 46.1%                 | Ref.                             |              | 18.7%                     | Ref.                             |             |
| High school diploma           | 35.6%                 | 0.4                              | -2.5, 3.4    | 45.9%                 | -0.2                             | -3.6, 3.2    | 18.4%                     | -0.3                             | -2.9, 2.4   |
| Less than high school diploma | 31.8%                 | -3.4                             | -8.4, 1.5    | 48.9%                 | 2.9                              | -2.7, 8.5    | 19.3%                     | 0.6                              | -3.4, 4.6   |
| Worry about HPV infection     |                       |                                  |              |                       |                                  |              |                           |                                  |             |
| Very worried                  | 35.2%                 | Ref.                             |              | 52.9%                 | Ref.                             |              | 11.9%                     | Ref.                             |             |
| Quite worried                 | 36.3%                 | 1.0                              | -4.5, 6.6    | 51.3%                 | -1.6                             | -8.0, 4.8    | 12.4%                     | 0.5                              | -4.2, 5.3   |
| A little worried              | 34.4%                 | -0.9                             | -6.3, 4.5    | 48.4%                 | -4.5                             | -10.7, 1.8   | 17.2%                     | 5.3*                             | 0.7, 10.0   |
| Not worried                   | 36.9%                 | 1.7                              | -4.3, 7.6    | 31.1%                 | -21.8*                           | -28.7, -14.9 | 31.9%                     | 20.1*                            | 14.6, 25.6  |
| Perception of vaccine safety  |                       |                                  |              |                       |                                  |              |                           |                                  |             |
| Very safe                     | 40.6%                 | Ref.                             |              | 50.2%                 | Ref.                             |              | 9.1%                      | Ref.                             |             |

|                                                      |       |        |              |       |        |              |       |       |             |
|------------------------------------------------------|-------|--------|--------------|-------|--------|--------------|-------|-------|-------------|
| Quite safe                                           | 34.6% | −6.0*  | −9.6, −2.5   | 50.9% | 0.6    | −3.3, 4.6    | 14.6% | 5.4*  | 2.7, 8.1    |
| Quite/Very unsafe                                    | 27.4% | −13.2* | −18.4, −7.9  | 21.9% | −28.3* | −33.9, −22.7 | 50.6% | 41.5* | 36.1, 47.0  |
| Dear ones' views on vaccination in general           |       |        |              |       |        |              |       |       |             |
| Very favorable                                       | 34.2% | Ref.   |              | 52.5% | Ref.   |              | 13.3% | Ref.  |             |
| Favorable                                            | 36.5% | 2.4    | −1.2, 6.0    | 47.6% | −5.0*  | −9.2, −0.8   | 15.9% | 2.6   | −0.5, 5.7   |
| Quite favorable                                      | 35.1% | 1.0    | −2.7, 4.7    | 44.9% | −7.6*  | −11.9, −3.3  | 19.9% | 6.6*  | 3.4, 9.8    |
| Quite unfavorable                                    | 36.4% | 2.2    | −3.5, 8.0    | 35.6% | −16.9* | −23.3, −10.5 | 28.0% | 14.7* | 9.5, 19.9   |
| Unfavorable/Very unfavorable                         | 34.8% | 0.7    | −5.5, 6.9    | 40.1% | −12.5* | −19.7, −5.3  | 25.1% | 11.8* | 6.2, 17.3   |
| Belief about having higher priority for vaccination§ |       |        |              |       |        |              |       |       |             |
| Yes (right)                                          | 53.8% | Ref.   |              | 33.7% | Ref.   |              | 12.5% | Ref.  |             |
| Yes (wrong)                                          | 53.2% | −0.6   | −9.2, 8.0    | 37.9% | 4.2    | −4.8, 13.1   | 8.9%  | −3.6  | −9.4, 2.3   |
| No                                                   | 19.9% | −33.9* | −42.8, −25.0 | 53.7% | 20.0*  | 10.6, 29.4   | 26.4% | 13.9* | 7.5, 20.4   |
| Don't know                                           | 26.1% | −27.7* | −36.1, −19.3 | 53.0% | 19.3*  | 10.4, 28.1   | 20.9% | 8.4*  | 2.4, 14.4   |
| Perceived ease of access to get the vaccine          |       |        |              |       |        |              |       |       |             |
| Very easy                                            | 38.0% | Ref.   |              | 39.5% | Ref.   |              | 22.5% | Ref.  |             |
| Quite easy                                           | 34.6% | −3.5   | −7.7, 0.7    | 45.6% | 6.1*   | 1.1, 11.1    | 19.8% | −2.6  | −7.0, 1.7   |
| Quite/Very difficult                                 | 34.2% | −3.8   | −8.8, 1.1    | 50.4% | 10.9*  | 5.1, 16.7    | 15.4% | −7.0* | −11.7, −2.4 |
| Perceived affordability of the vaccine               |       |        |              |       |        |              |       |       |             |
| Very affordable                                      | 38.5% | Ref.   |              | 43.1% | Ref.   |              | 18.5% | Ref.  |             |
| Quite affordable                                     | 34.5% | −3.9   | −8.0, 0.1    | 46.3% | 3.2    | −1.4, 7.8    | 19.2% | 0.8   | −2.8, 4.3   |
| Little/Not at all affordable                         | 34.1% | −4.4   | −9.0, 0.3    | 48.2% | 5.1    | −0.1, 10.4   | 17.7% | −0.8  | −4.7, 3.2   |

\* $P$ -value  $\leq 0.05$ , i.e.,  $\Delta$  significantly  $\neq 0$ .

†Including non-binary people and participants who did not disclose their gender identity.

‡Graded using the Eurostat Degree of Urbanization (DEGURBA) classification system.

§Those correctly aware of having higher priority for vaccination are female participants born between 1997 and 2004 or male participants born between 2003 and 2004.

HPV, human papillomavirus; NUTS, Nomenclature of Territorial Units for Statistics.

**Table S6.** Predictors of HPV vaccine uptake and hesitancy (expressed as delay vs. refusal) among participants who answered on their children's behalf ( $n = 1266$ ).

[illegible]

|                                                           |       |        |              |       |        |             |       |       |            |
|-----------------------------------------------------------|-------|--------|--------------|-------|--------|-------------|-------|-------|------------|
| Very worried                                              | 59.3% | Ref.   |              | 30.9% | Ref.   |             | 9.8%  | Ref.  |            |
| Quite worried                                             | 53.4% | -5.9   | -15.3, 3.5   | 36.3% | 5.4    | -4.3, 15.1  | 10.3% | 0.4   | -7.1, 7.9  |
| A little worried                                          | 54.8% | -4.5   | -14.0, 5.0   | 32.2% | 1.3    | -8.4, 11.1  | 13.0% | 3.1   | -4.2, 10.5 |
| Not worried                                               | 58.0% | -1.3   | -12.2, 9.7   | 15.5% | -15.3* | -25.9, -4.8 | 26.5% | 16.6* | 7.7, 25.5  |
| Perception of vaccine safety for the child                |       |        |              |       |        |             |       |       |            |
| Very safe                                                 | 62.3% | Ref.   |              | 35.2% | Ref.   |             | 2.5%  | Ref.  |            |
| Quite safe                                                | 56.9% | -5.4   | -12.2, 1.3   | 34.1% | -1.1   | -7.9, 5.6   | 9.1%  | 6.6*  | 3.7, 9.5   |
| Quite/Very unsafe                                         | 34.9% | -27.4* | -38.9, -15.9 | 19.9% | -15.3* | -25.3, -5.4 | 45.2% | 42.7* | 32.6, 52.9 |
| Dear ones' views on vaccination in general                |       |        |              |       |        |             |       |       |            |
| Very favorable                                            | 52.2% | Ref.   |              | 34.4% | Ref.   |             | 13.4% | Ref.  |            |
| Favorable                                                 | 51.9% | -0.3   | -7.2, 6.7    | 34.1% | -0.3   | -7.4, 6.7   | 14.0% | 0.6   | -4.4, 5.6  |
| Quite favorable                                           | 58.2% | 6.0    | -1.0, 13.0   | 28.3% | -6.1   | -13.2, 0.9  | 13.5% | 0.1   | -4.7, 4.9  |
| Quite unfavorable                                         | 56.2% | 4.0    | -6.7, 14.7   | 31.5% | -2.9   | -13.7, 8.0  | 12.3% | -1.1  | -6.9, 4.7  |
| Unfavorable/Very unfavorable                              | 57.0% | 4.8    | -7.6, 17.2   | 23.5% | -10.9  | -23.1, 1.4  | 19.5% | 6.1   | -1.2, 13.4 |
| Belief that the child has priority for vaccination§       |       |        |              |       |        |             |       |       |            |
| Yes (right)                                               | 70.3% | Ref.   |              | 21.9% | Ref.   |             | 7.9%  | Ref.  |            |
| Yes (wrong)                                               | 62.3% | -8.0   | -18.0, 2.1   | 30.7% | 8.8    | -0.3, 17.9  | 7.0%  | -0.9  | -5.7, 4.0  |
| No                                                        | 24.7% | -45.6* | -55.0, -36.2 | 46.4% | 24.5*  | 14.5, 34.5  | 28.9% | 21.1* | 13.6, 28.5 |
| Don't know                                                | 31.7% | -38.6* | -45.7, -31.5 | 49.2% | 27.3*  | 20.4, 34.3  | 19.1% | 11.3* | 6.9, 15.6  |
| Perceived ease of access for the child to get the vaccine |       |        |              |       |        |             |       |       |            |
| Very easy                                                 | 60.4% | Ref.   |              | 26.6% | Ref.   |             | 13.0% | Ref.  |            |
| Quite easy                                                | 51.4% | -8.9*  | -15.4, -2.5  | 32.6% | 5.9    | -0.4, 12.3  | 16.0% | 3.0   | -1.1, 7.1  |
| Quite/Very difficult                                      | 55.6% | -4.7   | -14.0, 4.5   | 33.4% | 6.8    | -2.3, 15.9  | 10.9% | -2.1  | -6.8, 2.6  |
| Perceived affordability of the vaccine for the child      |       |        |              |       |        |             |       |       |            |
| Very affordable                                           | 51.3% | Ref.   |              | 33.5% | Ref.   |             | 15.2% | Ref.  |            |
| Quite affordable                                          | 55.1% | 3.8    | -2.2, 9.8    | 30.7% | -2.8   | -9.0, 3.4   | 14.3% | -1.0  | -4.9, 3.0  |
| Little/Not at all affordable                              | 59.8% | 8.5*   | 0.0, 17.0    | 27.2% | -6.3   | -14.8, 2.2  | 13.0% | -2.2  | -7.0, 2.7  |

\* $P$ -value  $\leq 0.05$ , i.e.,  $\Delta$  significantly  $\neq 0$ .

†Including non-binary people and participants who did not disclose their gender identity.

‡Graded using the Eurostat Degree of Urbanization (DEGURBA) classification system.

§Those correctly aware that their children have higher priority for vaccination are parents of offspring born between 2003 and 2010.

HPV, human papillomavirus; NUTS, Nomenclature of Territorial Units for Statistics.

## SUPPLEMENTARY FIGURES

**Figure S1.** Worry about getting HPV infection among female participants 26 years of age and older who answered on their own behalf ( $n = 2109$ ), overall and by NUTS.

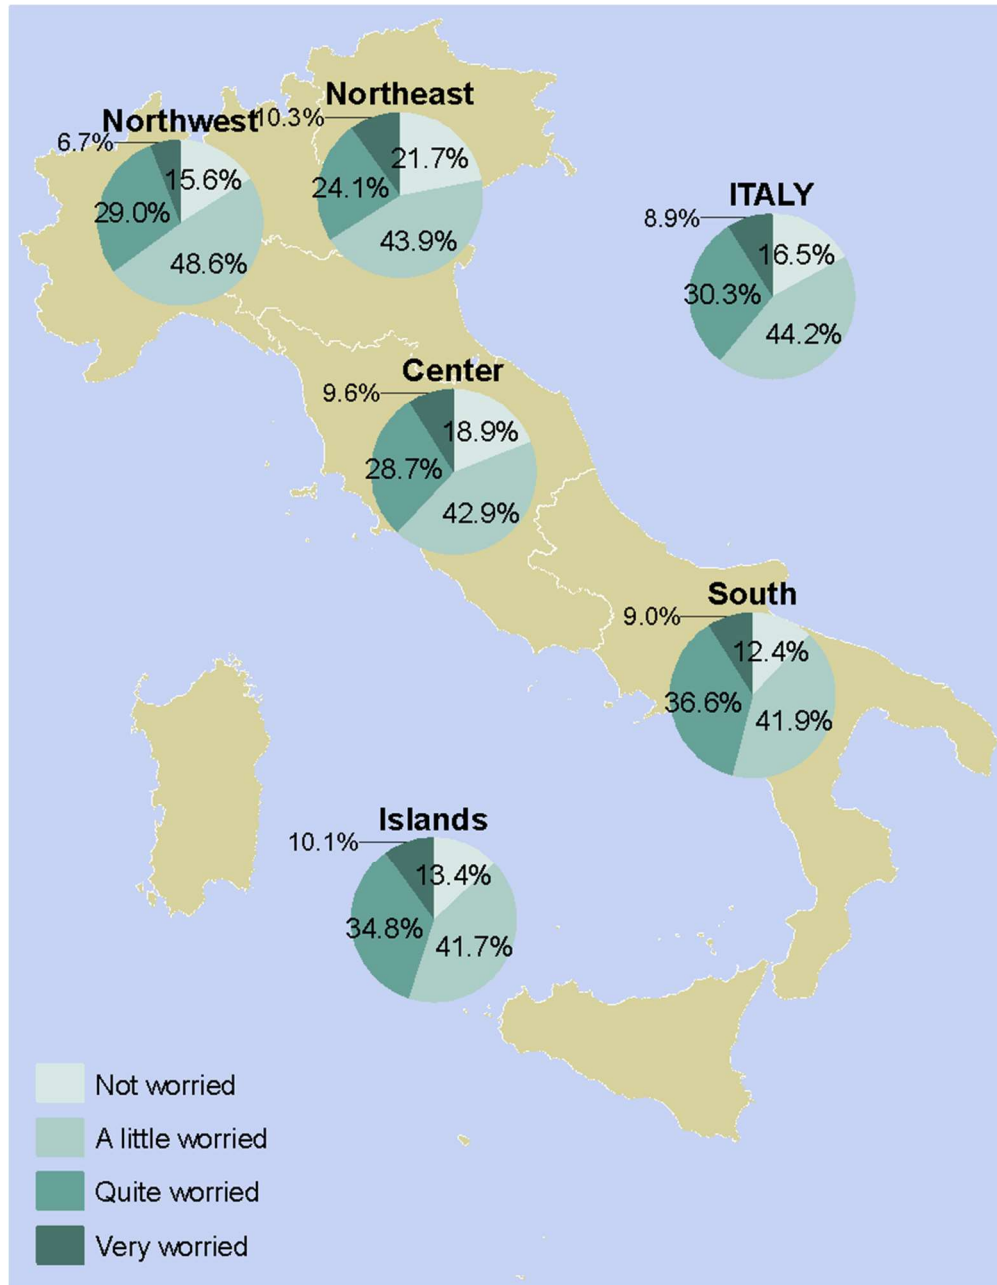

*Notes:* Females include non-binary people and participants who did not disclose their gender identity. Piedmont, Aosta Valley, Lombardy, and Liguria constitute Northwestern Italy; Trentino-South Tyrol, Veneto, Friuli-Venezia Giulia, and Emilia-Romagna constitute Northeastern Italy; Tuscany, Umbria, Marche, and Lazio constitute Central Italy; Abruzzo, Molise, Campania, Apulia, Basilicata, and Calabria constitute Southern Italy; Sicily and Sardinia constitute Insular Italy.

*HPV*, human papillomavirus; *NUTS*, Nomenclature of Territorial Units for Statistics.

**Figure S2.** Worry about getting HPV infection among male vs. female participants between 18 and 25 years of age who answered on their own behalf ( $n = 1051$ ), overall and by NUTS (%).

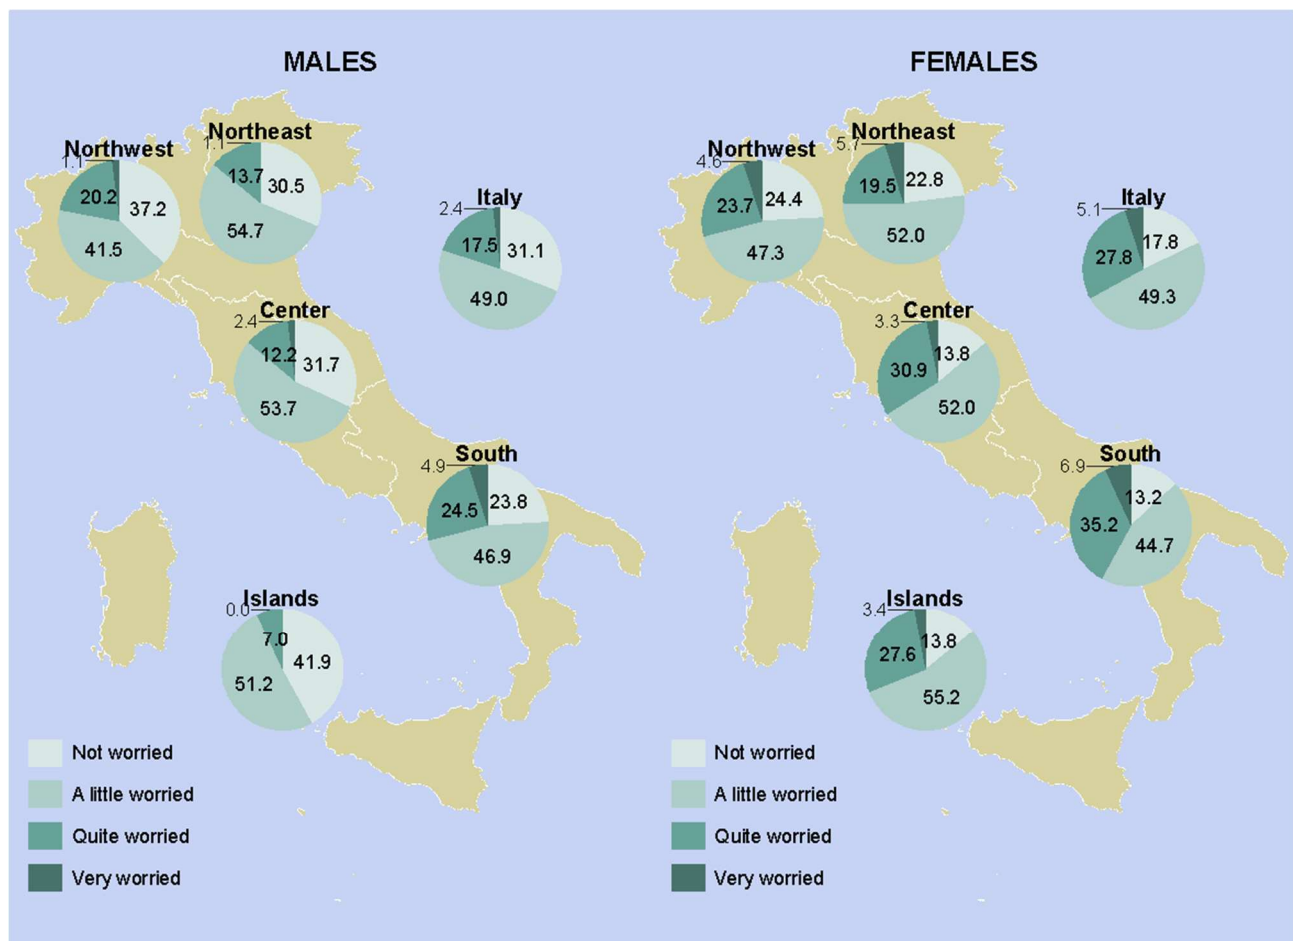

*Notes:* Females include non-binary people and participants who did not disclose their gender identity. Piedmont, Aosta Valley, Lombardy, and Liguria constitute Northwestern Italy; Trentino-South Tyrol, Veneto, Friuli-Venezia Giulia, and Emilia-Romagna constitute Northeastern Italy; Tuscany, Umbria, Marche, and Lazio constitute Central Italy; Abruzzo, Molise, Campania, Apulia, Basilicata, and Calabria constitute Southern Italy; Sicily and Sardinia constitute Insular Italy.

*HPV*, human papillomavirus; *NUTS*, Nomenclature of Territorial Units for Statistics.

**Figure S3.** Worry about getting HPV infection among male vs. female offspring between 9 and 11 years of age ( $n = 427$ ), overall and by NUTS (%).

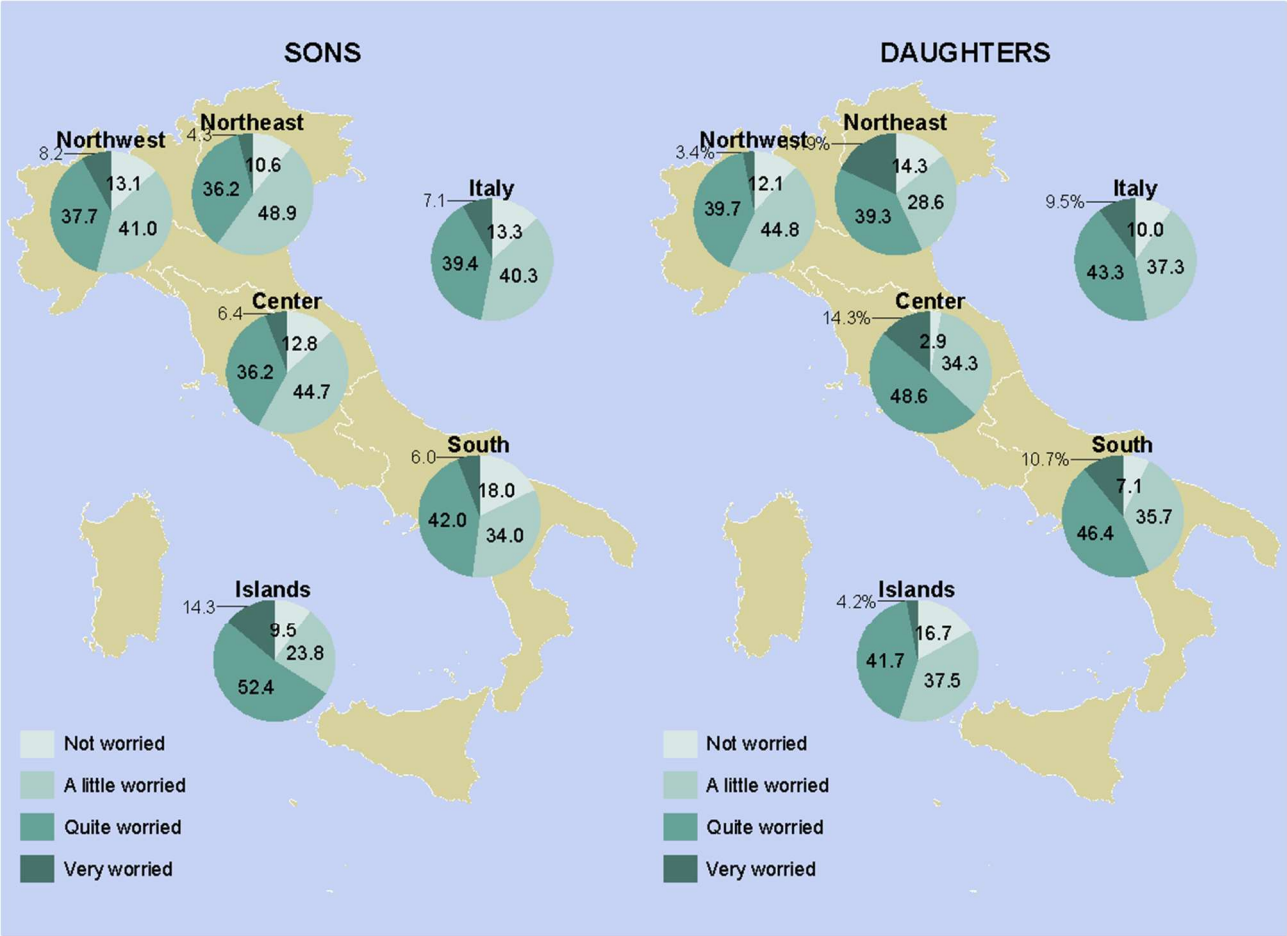

*Notes:* Information was provided by the parents of the children. Piedmont, Aosta Valley, Lombardy, and Liguria constitute Northwestern Italy; Trentino-South Tyrol, Veneto, Friuli-Venezia Giulia, and Emilia-Romagna constitute Northeastern Italy; Tuscany, Umbria, Marche, and Lazio constitute Central Italy; Abruzzo, Molise, Campania, Apulia, Basilicata, and Calabria constitute Southern Italy; Sicily and Sardinia constitute Insular Italy. *HPV*, human papillomavirus; *NUTS*, Nomenclature of Territorial Units for Statistics.

**Figure S4.** Worry about getting HPV infection among male vs. female offspring between 12 and 17 years of age ( $n = 839$ ), overall and by NUTS (%).

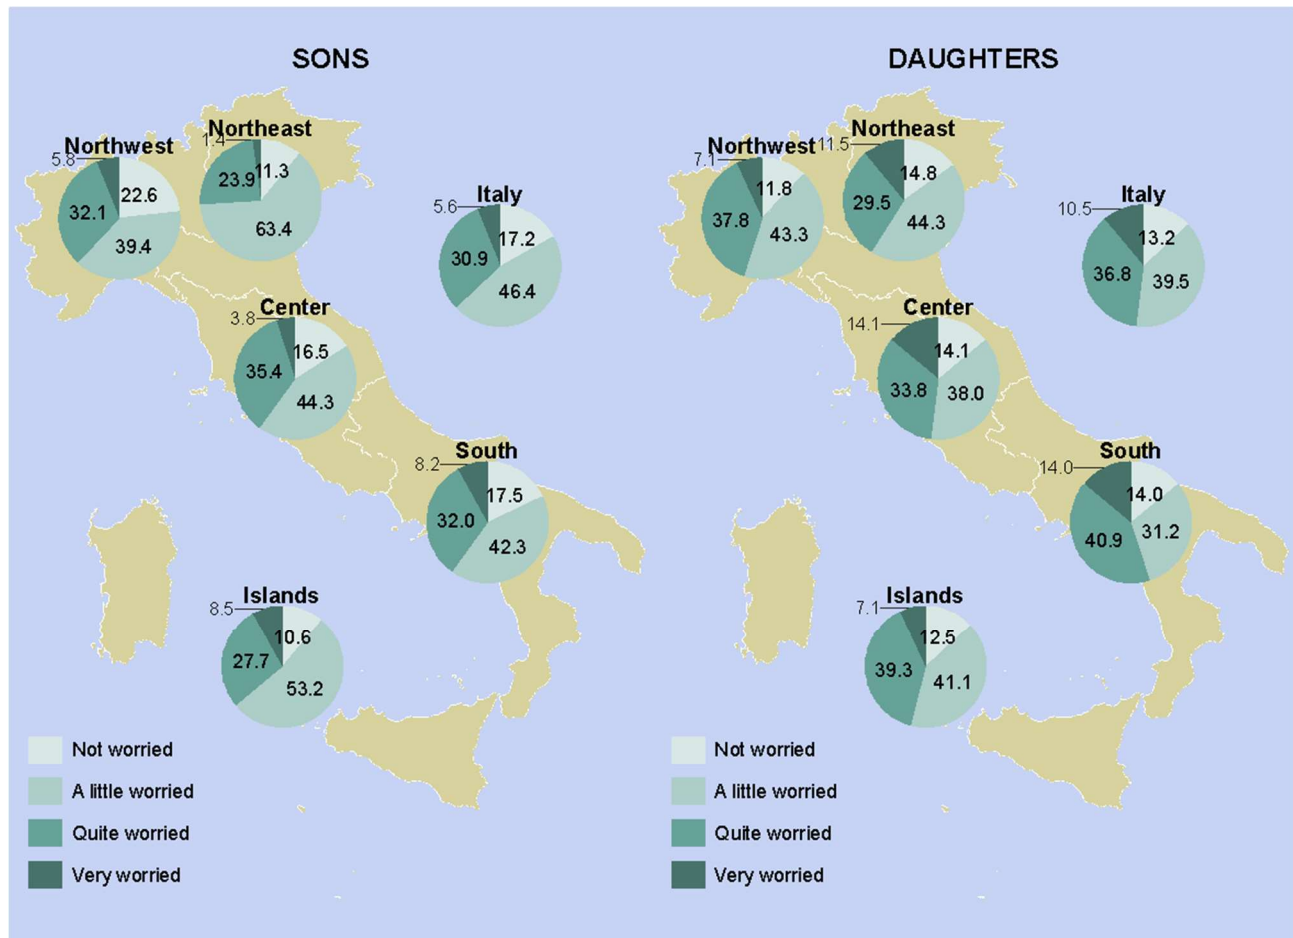

*Notes:* Information was provided by the parents of the children. Piedmont, Aosta Valley, Lombardy, and Liguria constitute Northwestern Italy; Trentino-South Tyrol, Veneto, Friuli-Venezia Giulia, and Emilia-Romagna constitute Northeastern Italy; Tuscany, Umbria, Marche, and Lazio constitute Central Italy; Abruzzo, Molise, Campania, Apulia, Basilicata, and Calabria constitute Southern Italy; Sicily and Sardinia constitute Insular Italy. *HPV*, human papillomavirus; *NUTS*, Nomenclature of Territorial Units for Statistics.

**Figure S5.** Perception of the safety of HPV vaccine among female participants 26 years of age and older who answered on their own behalf ( $n = 2109$ ), overall and by NUTS.

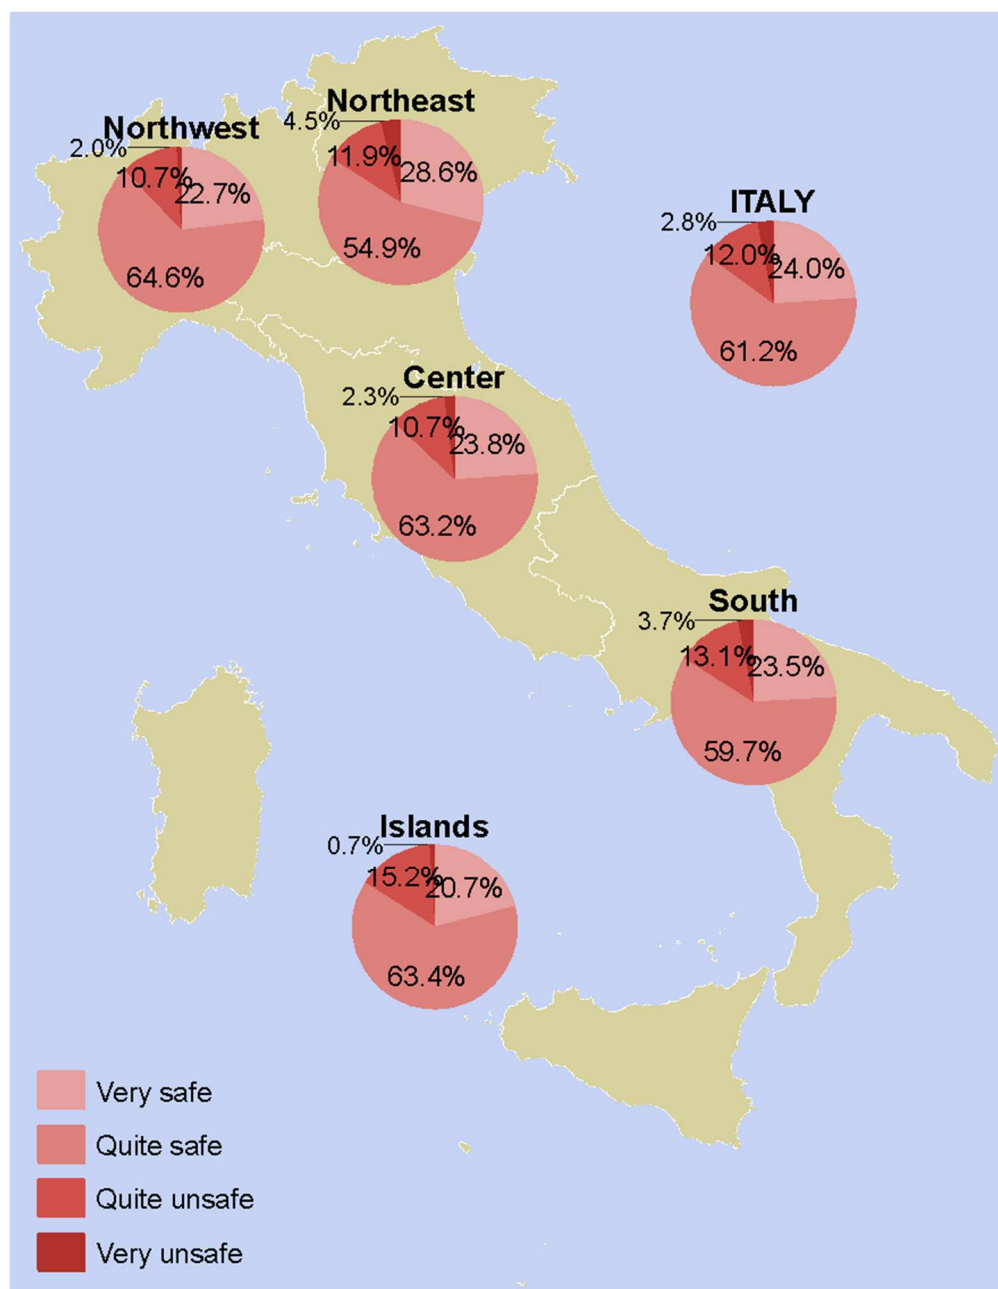

*Notes:* Females include non-binary people and participants who did not disclose their gender identity. Piedmont, Aosta Valley, Lombardy, and Liguria constitute Northwestern Italy; Trentino-South Tyrol, Veneto, Friuli-Venezia Giulia, and Emilia-Romagna constitute Northeastern Italy; Tuscany, Umbria, Marche, and Lazio constitute Central Italy; Abruzzo, Molise, Campania, Apulia, Basilicata, and Calabria constitute Southern Italy; Sicily and Sardinia constitute Insular Italy.

*HPV*, human papillomavirus; *NUTS*, Nomenclature of Territorial Units for Statistics.

**Figure S6.** Perception of the safety of HPV vaccine among male vs. female participants between 18 and 25 years of age who answered on their own behalf ( $n = 1051$ ), overall and by NUTS.

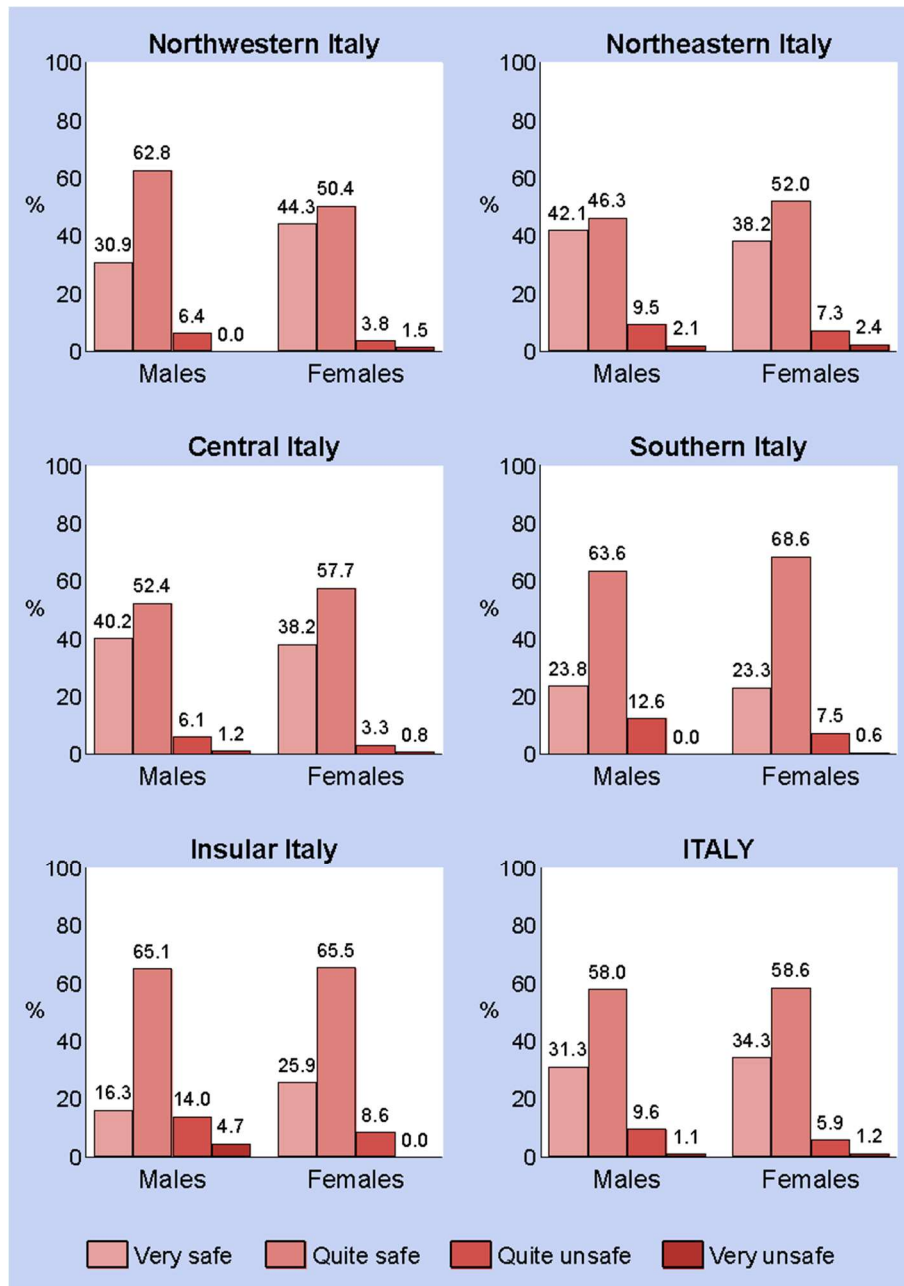

*Notes:* The presence of zero counts made it impossible to visualize the data as thematic maps using the ‘spmap’ Stata command. Females include non-binary people and participants who did not disclose their gender identity. Piedmont, Aosta Valley, Lombardy, and Liguria constitute Northwestern Italy; Trentino-South Tyrol, Veneto, Friuli-Venezia Giulia, and Emilia-Romagna constitute Northeastern Italy; Tuscany, Umbria, Marche, and Lazio constitute Central Italy; Abruzzo, Molise, Campania, Apulia, Basilicata, and Calabria constitute Southern Italy; Sicily and Sardinia constitute Insular Italy. HPV, human papillomavirus; NUTS, Nomenclature of Territorial Units for Statistics.

**Figure S7.** Perception of the safety of HPV vaccine among male vs. female offspring between 9 and 11 years of age ( $n = 427$ ), overall and by NUTS (%).

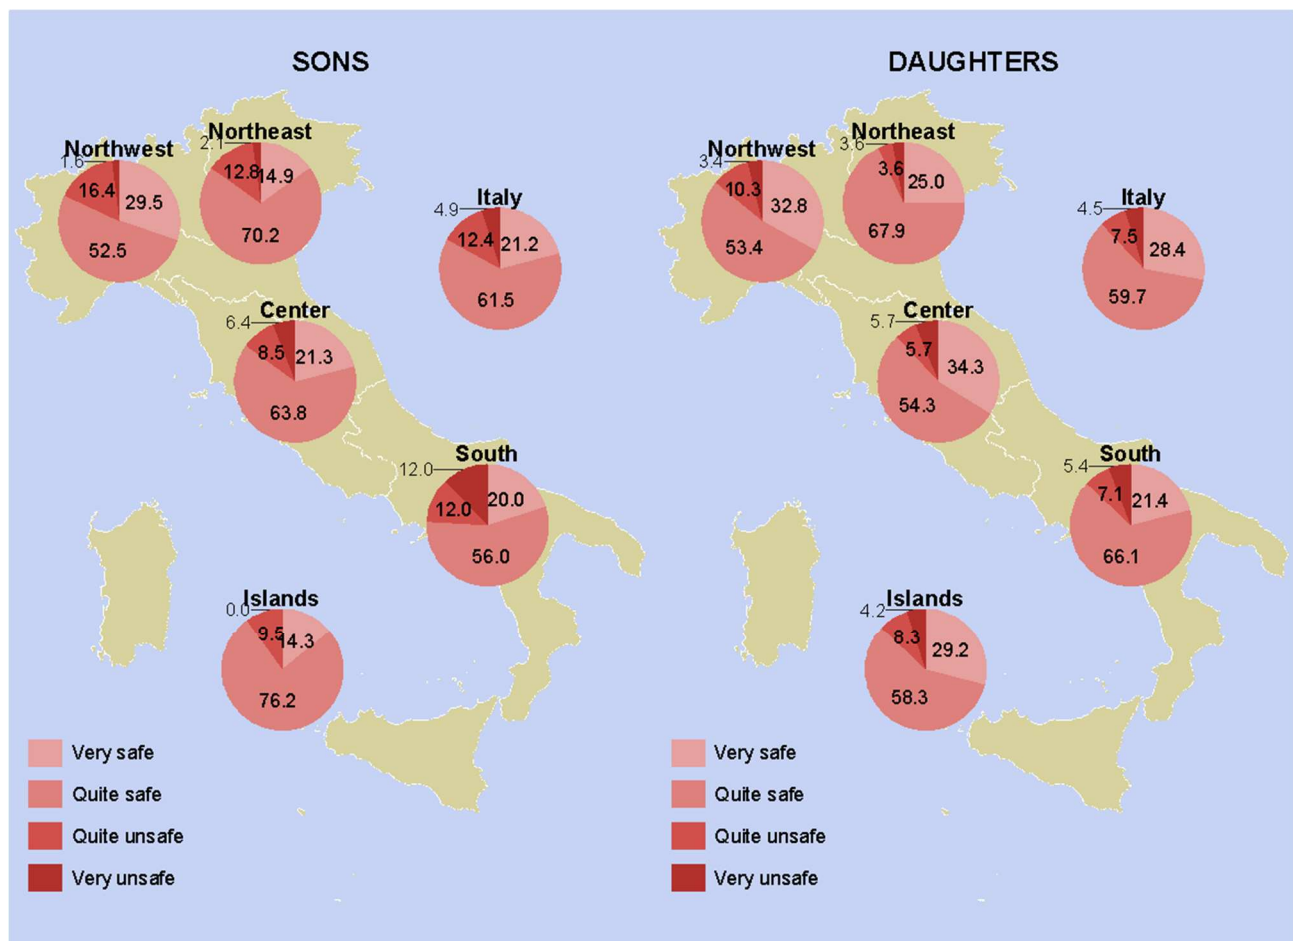

*Notes:* Information was provided by the parents of the children. Piedmont, Aosta Valley, Lombardy, and Liguria constitute Northwestern Italy; Trentino-South Tyrol, Veneto, Friuli-Venezia Giulia, and Emilia-Romagna constitute Northeastern Italy; Tuscany, Umbria, Marche, and Lazio constitute Central Italy; Abruzzo, Molise, Campania, Apulia, Basilicata, and Calabria constitute Southern Italy; Sicily and Sardinia constitute Insular Italy. HPV, human papillomavirus; NUTS, Nomenclature of Territorial Units for Statistics.

**Figure S8.** Perception of the safety of HPV vaccine among male vs. female offspring between 12 and 17 years of age ( $n = 839$ ), overall and by NUTS (%).

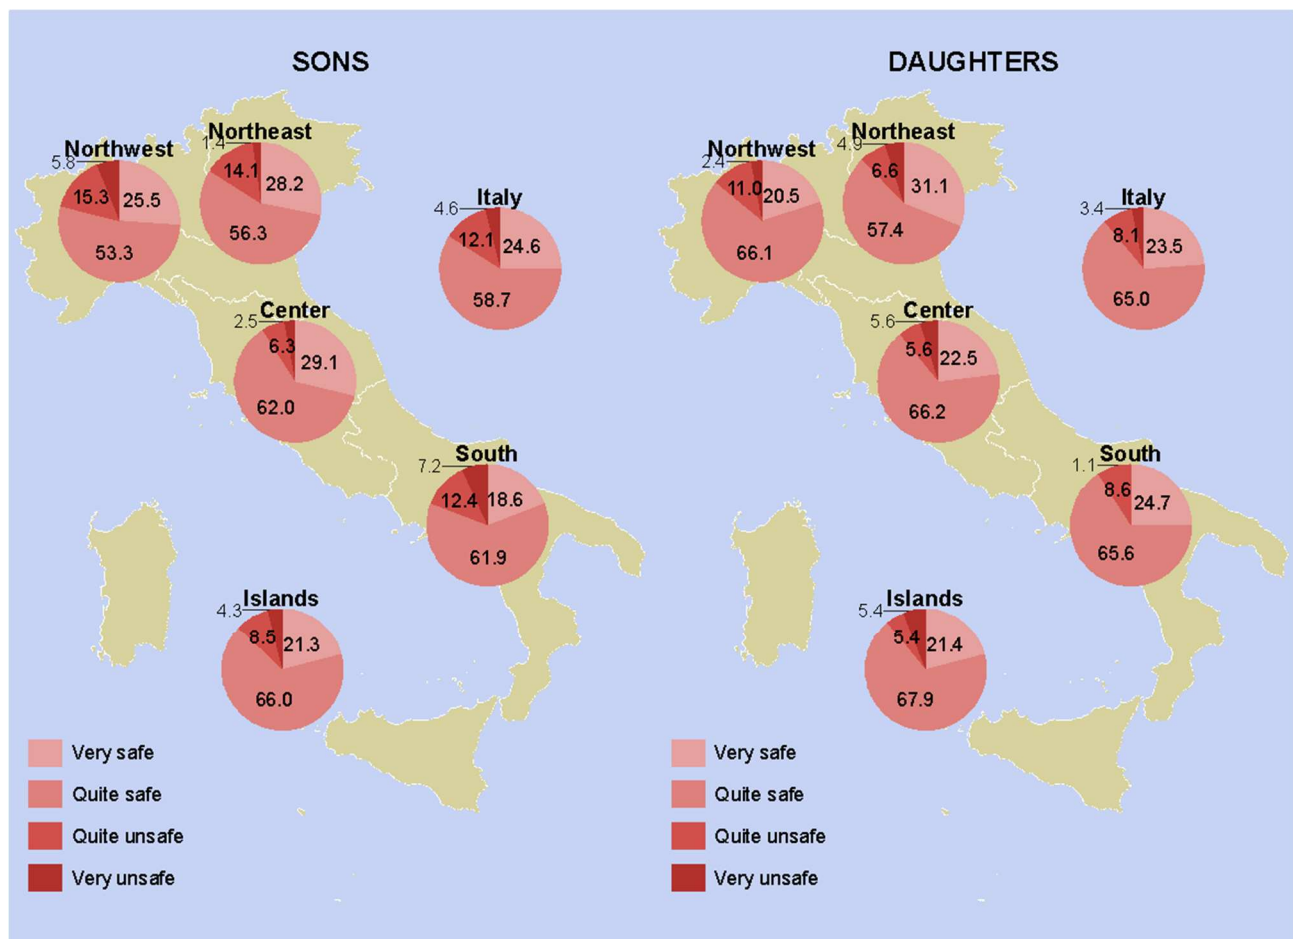

*Notes:* Information was provided by the parents of the children. Piedmont, Aosta Valley, Lombardy, and Liguria constitute Northwestern Italy; Trentino-South Tyrol, Veneto, Friuli-Venezia Giulia, and Emilia-Romagna constitute Northeastern Italy; Tuscany, Umbria, Marche, and Lazio constitute Central Italy; Abruzzo, Molise, Campania, Apulia, Basilicata, and Calabria constitute Southern Italy; Sicily and Sardinia constitute Insular Italy. *HPV*, human papillomavirus; *NUTS*, Nomenclature of Territorial Units for Statistics.

**Figure S9.** Perception of how easy it is to access healthcare facilities to get an HPV vaccine among female participants 26 years of age and older who answered on their own behalf ( $n = 2109$ ), overall and by NUTS.

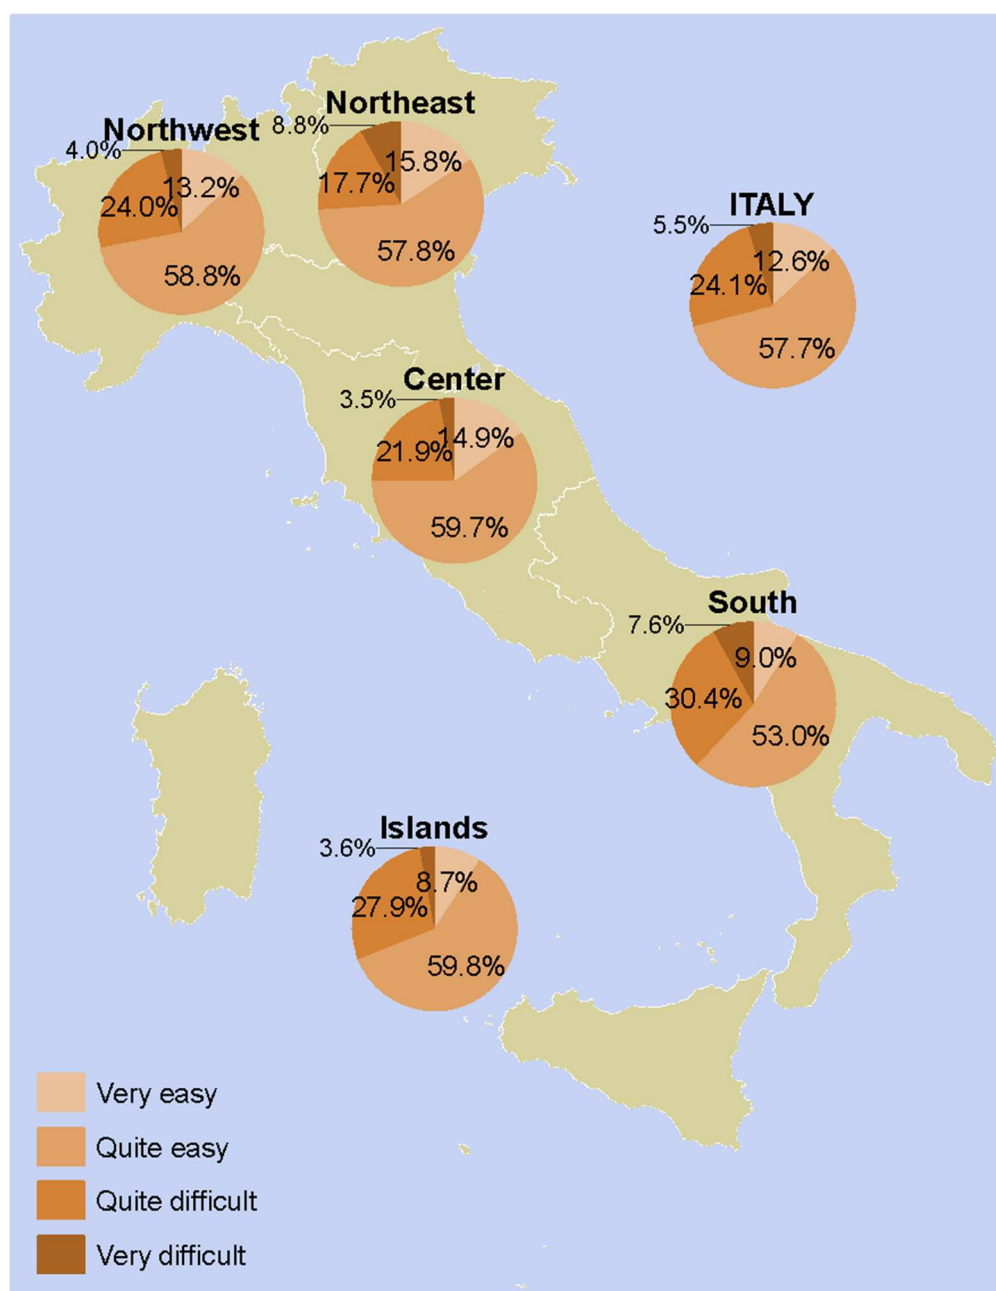

*Notes:* Females include non-binary people and participants who did not disclose their gender identity. Piedmont, Aosta Valley, Lombardy, and Liguria constitute Northwestern Italy; Trentino-South Tyrol, Veneto, Friuli-Venezia Giulia, and Emilia-Romagna constitute Northeastern Italy; Tuscany, Umbria, Marche, and Lazio constitute Central Italy; Abruzzo, Molise, Campania, Apulia, Basilicata, and Calabria constitute Southern Italy; Sicily and Sardinia constitute Insular Italy.

*HPV*, human papillomavirus; *NUTS*, Nomenclature of Territorial Units for Statistics.

**Figure S10.** Perception of how easy it is to access healthcare facilities to get an HPV vaccine among male vs. female participants between 18 and 25 years of age who answered on their own behalf ( $n = 1051$ ), overall and by NUTS (%).

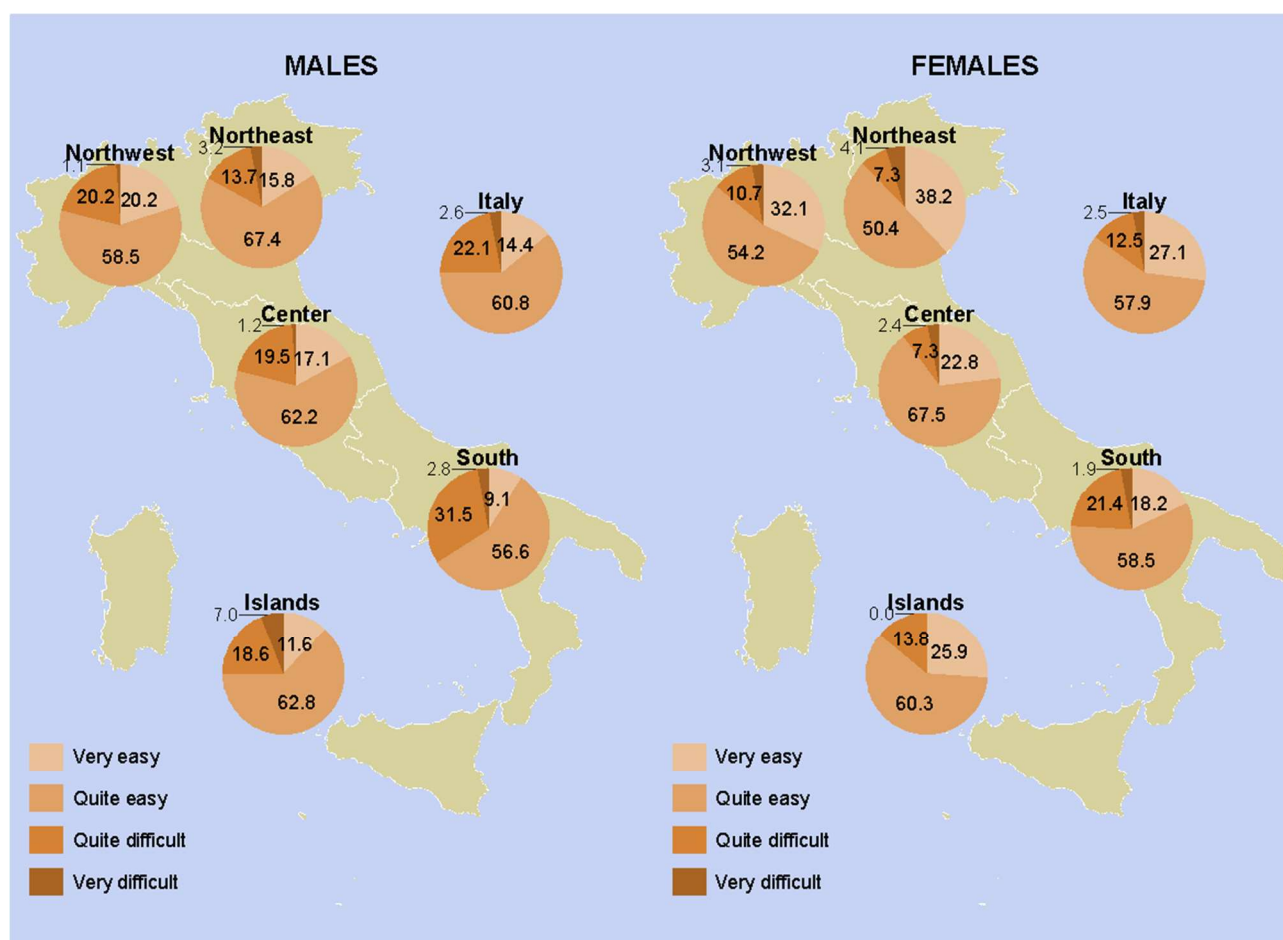

*Notes:* Females include non-binary people and participants who did not disclose their gender identity. Piedmont, Aosta Valley, Lombardy, and Liguria constitute Northwestern Italy; Trentino-South Tyrol, Veneto, Friuli-Venezia Giulia, and Emilia-Romagna constitute Northeastern Italy; Tuscany, Umbria, Marche, and Lazio constitute Central Italy; Abruzzo, Molise, Campania, Apulia, Basilicata, and Calabria constitute Southern Italy; Sicily and Sardinia constitute Insular Italy.

*HPV*, human papillomavirus; *NUTS*, Nomenclature of Territorial Units for Statistics.

**Figure S11.** Perception of how easy it is to access healthcare facilities to get an HPV vaccine among male vs. female offspring between 9 and 11 years of age ( $n = 427$ ), overall and by NUTS (%).

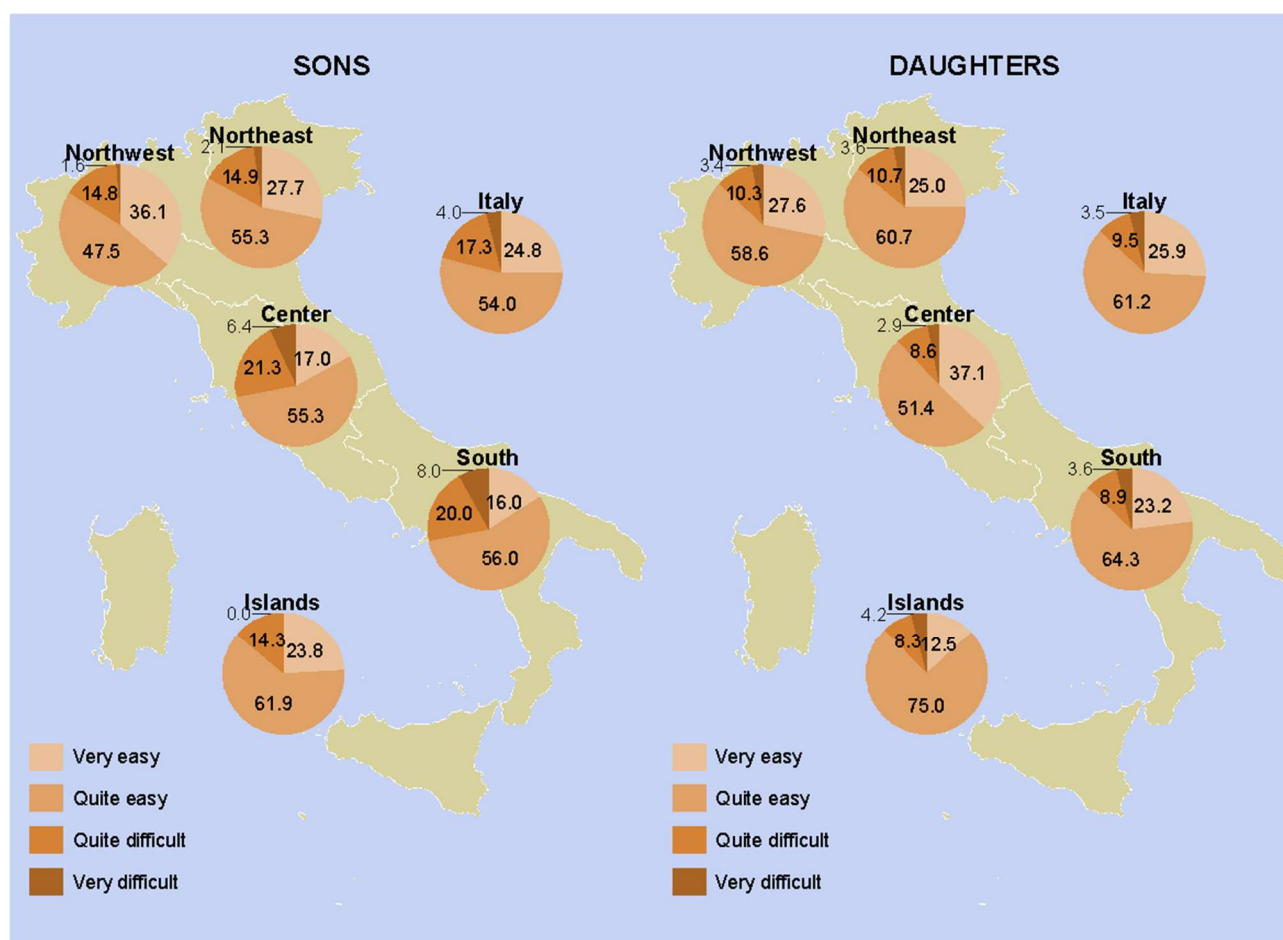

*Notes:* Information was provided by the parents of the children. Piedmont, Aosta Valley, Lombardy, and Liguria constitute Northwestern Italy; Trentino-South Tyrol, Veneto, Friuli-Venezia Giulia, and Emilia-Romagna constitute Northeastern Italy; Tuscany, Umbria, Marche, and Lazio constitute Central Italy; Abruzzo, Molise, Campania, Apulia, Basilicata, and Calabria constitute Southern Italy; Sicily and Sardinia constitute Insular Italy. *HPV*, human papillomavirus; *NUTS*, Nomenclature of Territorial Units for Statistics.

**Figure S12.** Perception of how easy it is to access healthcare facilities to get an HPV vaccine among male vs. female offspring between 12 and 17 years of age ( $n = 839$ ), overall and by NUTS (%).

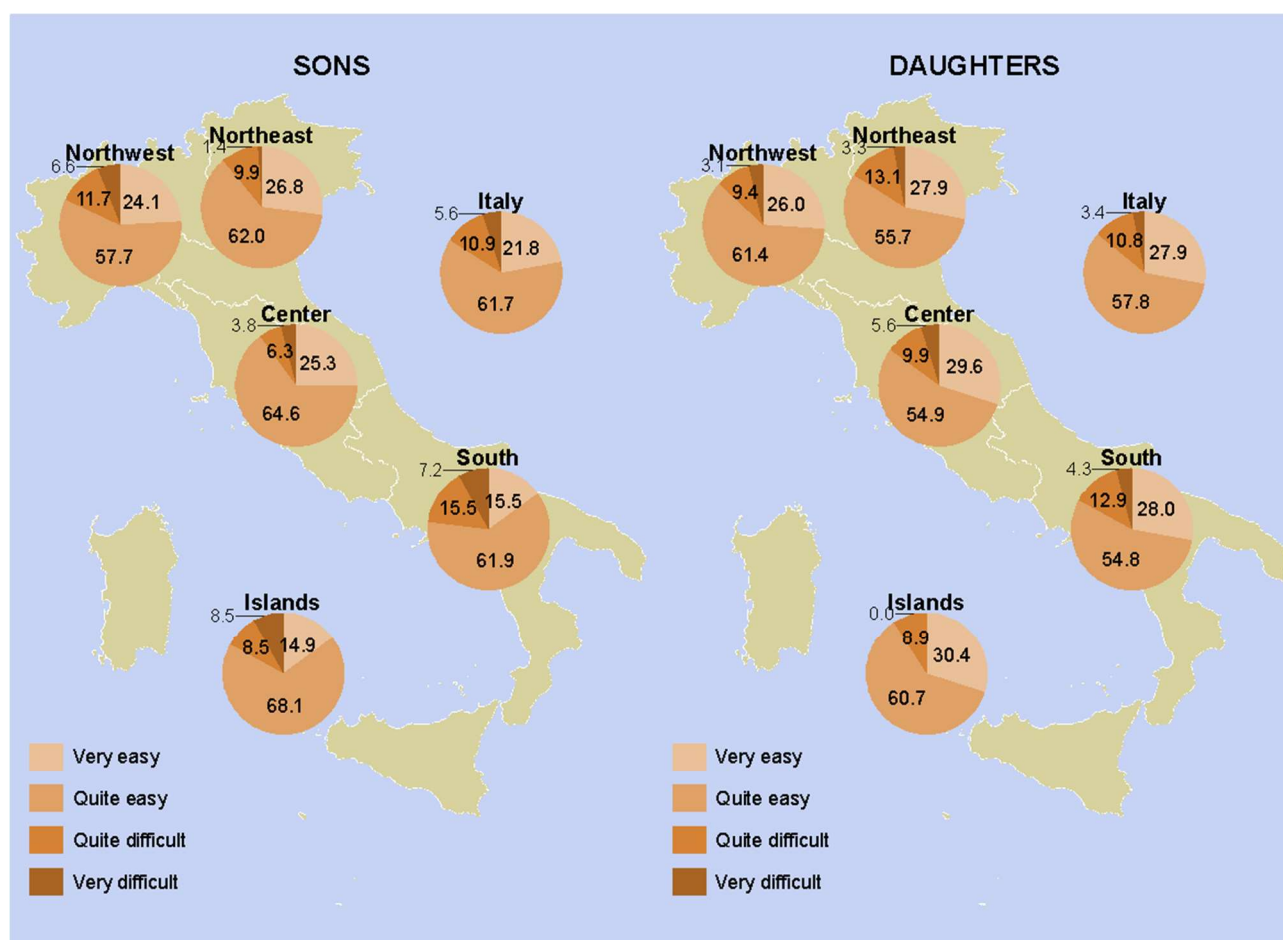

*Notes:* Information was provided by the parents of the children. Piedmont, Aosta Valley, Lombardy, and Liguria constitute Northwestern Italy; Trentino-South Tyrol, Veneto, Friuli-Venezia Giulia, and Emilia-Romagna constitute Northeastern Italy; Tuscany, Umbria, Marche, and Lazio constitute Central Italy; Abruzzo, Molise, Campania, Apulia, Basilicata, and Calabria constitute Southern Italy; Sicily and Sardinia constitute Insular Italy. *HPV*, human papillomavirus; *NUTS*, Nomenclature of Territorial Units for Statistics.

**Figure S13.** Perception of the affordability of HPV vaccines among female participants 26 years of age and older who answered on their own behalf ( $n = 2109$ ), overall and by NUTS.

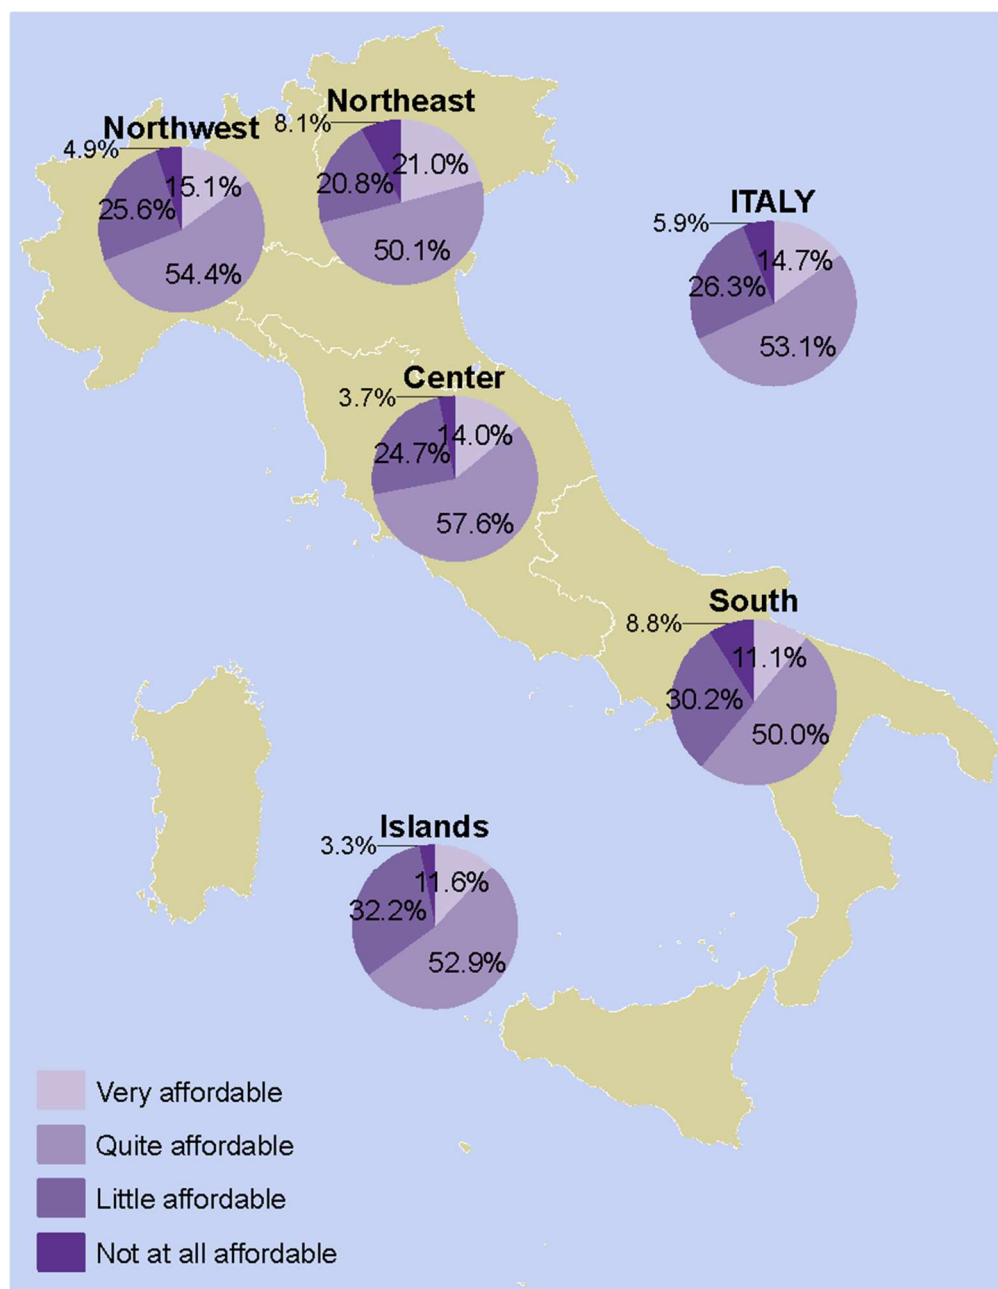

*Notes:* Females include non-binary people and participants who did not disclose their gender identity. Piedmont, Aosta Valley, Lombardy, and Liguria constitute Northwestern Italy; Trentino-South Tyrol, Veneto, Friuli-Venezia Giulia, and Emilia-Romagna constitute Northeastern Italy; Tuscany, Umbria, Marche, and Lazio constitute Central Italy; Abruzzo, Molise, Campania, Apulia, Basilicata, and Calabria constitute Southern Italy; Sicily and Sardinia constitute Insular Italy.

*HPV*, human papillomavirus; *NUTS*, Nomenclature of Territorial Units for Statistics.

**Figure S14.** Perception of the affordability of HPV vaccines among male vs. female participants between 18 and 25 years of age who answered on their own behalf ( $n = 1051$ ), overall and by NUTS.

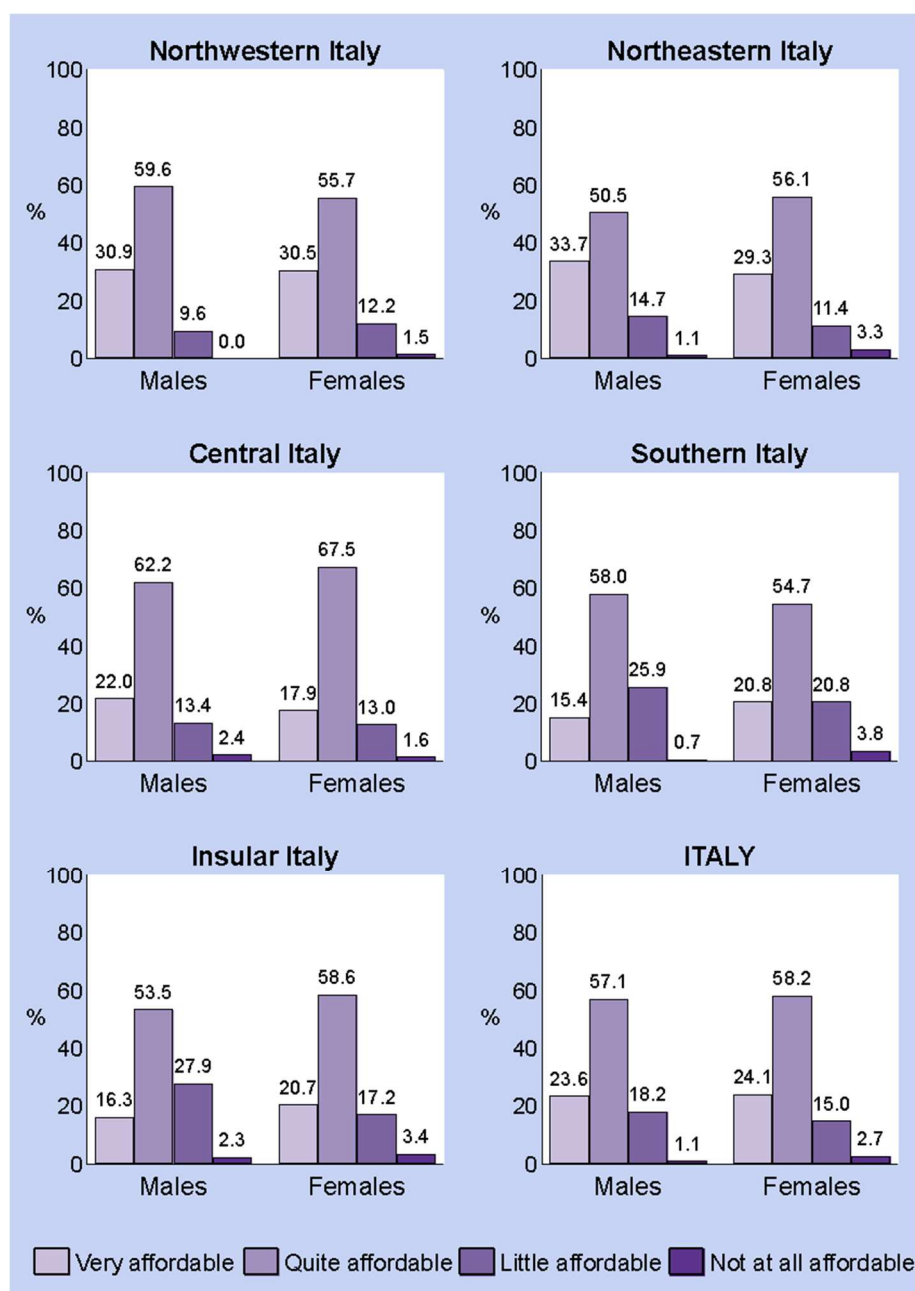

*Notes:* The presence of zero counts made it impossible to visualize the data as thematic maps using the ‘spmap’ Stata command. Females include non-binary people and participants who did not disclose their gender identity. Piedmont, Aosta Valley, Lombardy, and Liguria constitute Northwestern Italy; Trentino-South Tyrol, Veneto, Friuli-Venezia Giulia, and Emilia-Romagna constitute Northeastern Italy; Tuscany, Umbria, Marche, and Lazio constitute Central Italy; Abruzzo, Molise, Campania, Apulia, Basilicata, and Calabria constitute Southern Italy; Sicily and Sardinia constitute Insular Italy.

HPV, human papillomavirus; NUTS, Nomenclature of Territorial Units for Statistics.

**Figure S15.** Perception of the affordability of HPV vaccines among male vs. female offspring between 9 and 11 years of age ( $n = 427$ ), overall and by NUTS.

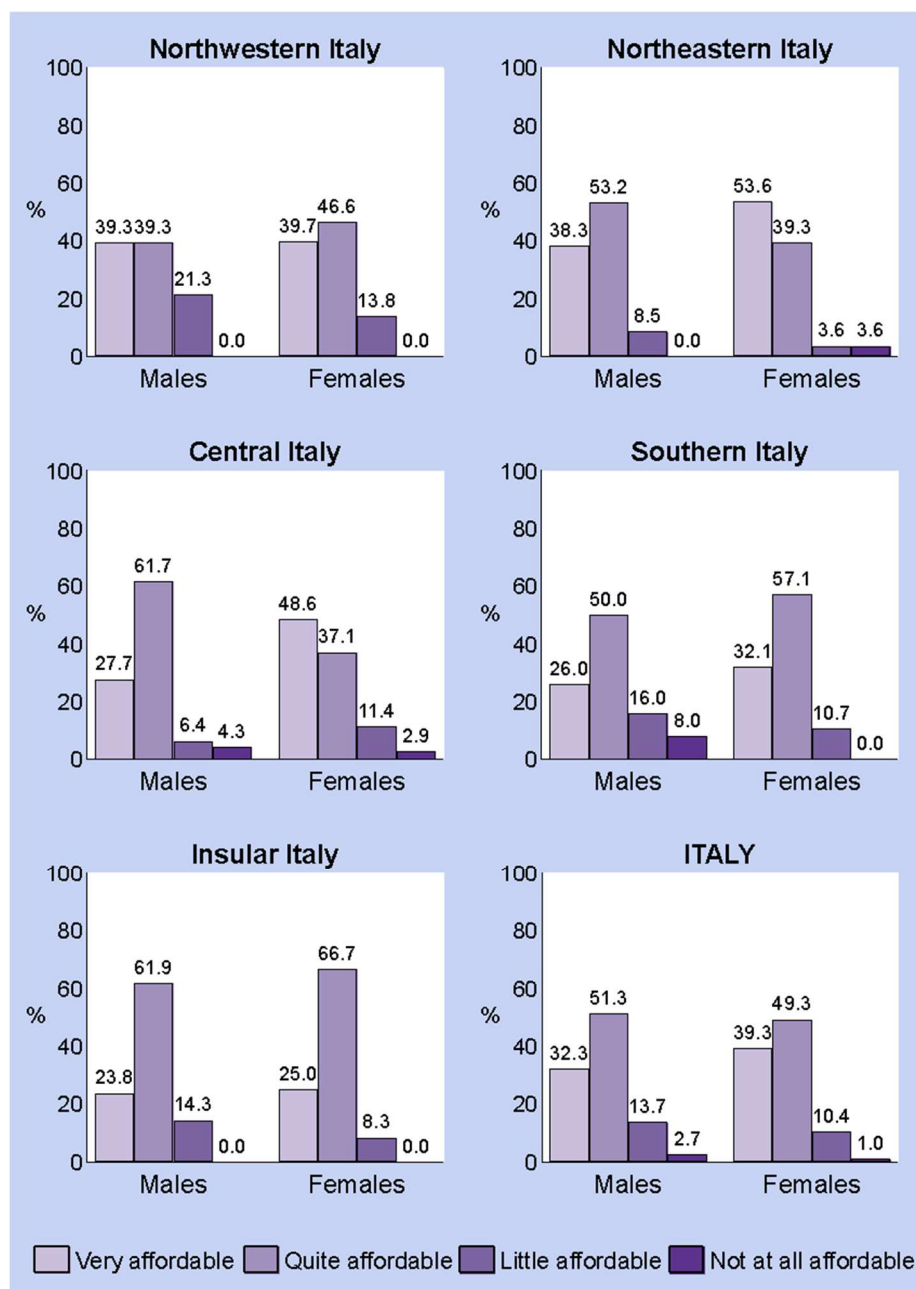

*Notes:* The presence of zero counts made it impossible to visualize the data as thematic maps using the ‘spmap’ Stata command. Information was provided by the parents of the children. Piedmont, Aosta Valley, Lombardy, and Liguria constitute Northwestern Italy; Trentino-South Tyrol, Veneto, Friuli-Venezia Giulia, and Emilia-Romagna constitute Northeastern Italy; Tuscany, Umbria, Marche, and Lazio constitute Central Italy; Abruzzo, Molise, Campania, Apulia, Basilicata, and Calabria constitute Southern Italy; Sicily and Sardinia constitute Insular Italy. *HPV*, human papillomavirus; *NUTS*, Nomenclature of Territorial Units for Statistics.

**Figure S16.** Perception of the affordability of HPV vaccines among male vs. female offspring between 12 and 17 years of age ( $n = 839$ ), overall and by NUTS (%).

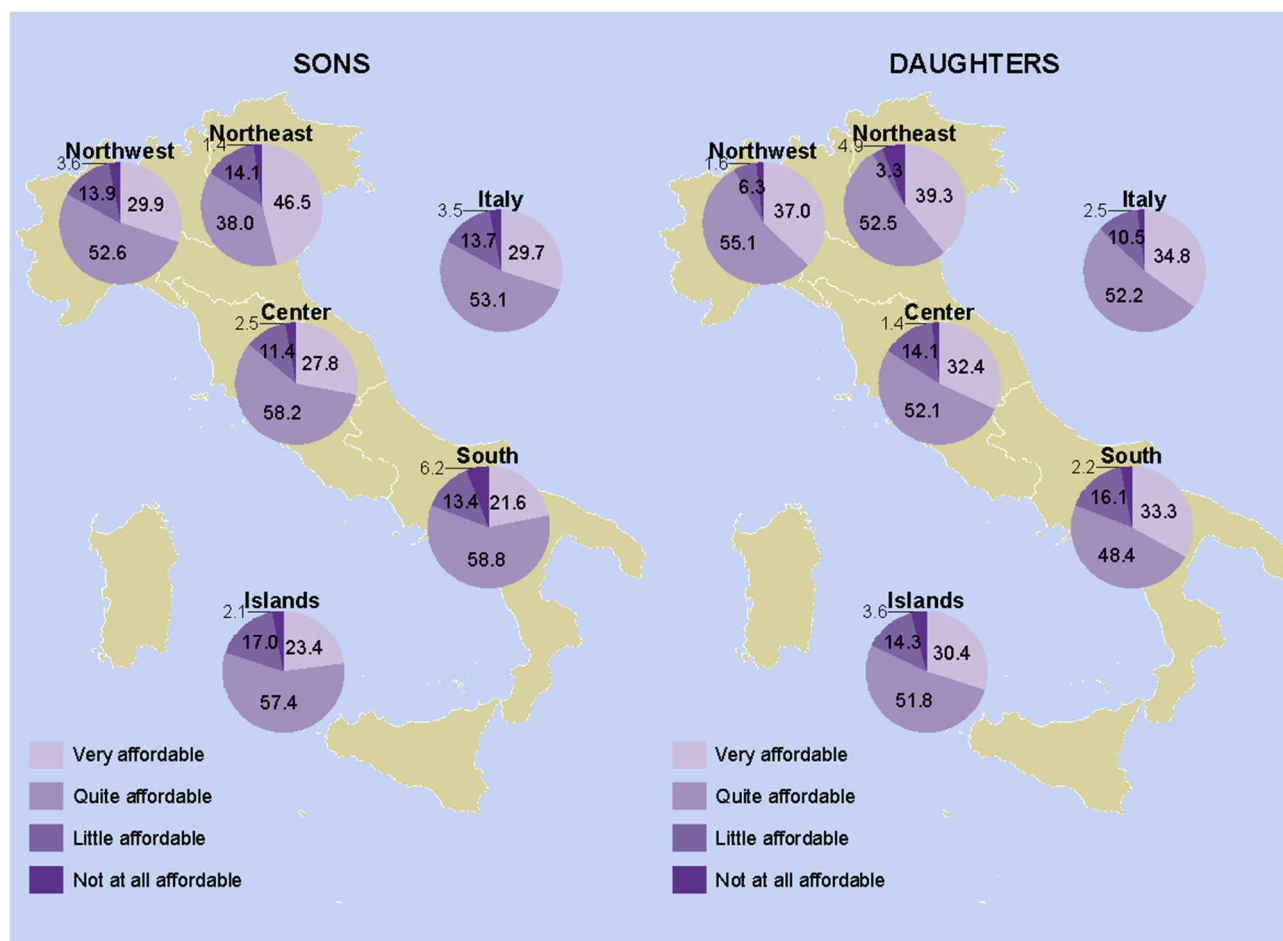

*Notes:* Information was provided by the parents of the children. Piedmont, Aosta Valley, Lombardy, and Liguria constitute Northwestern Italy; Trentino-South Tyrol, Veneto, Friuli-Venezia Giulia, and Emilia-Romagna constitute Northeastern Italy; Tuscany, Umbria, Marche, and Lazio constitute Central Italy; Abruzzo, Molise, Campania, Apulia, Basilicata, and Calabria constitute Southern Italy; Sicily and Sardinia constitute Insular Italy. *HPV*, human papillomavirus; *NUTS*, Nomenclature of Territorial Units for Statistics.

**Figure S17.** Payment for HPV vaccination among female participants 26 years of age and older who answered on their own behalf, overall and by NUTS; only subjects vaccinated against HPV are included ( $n = 457$ ).

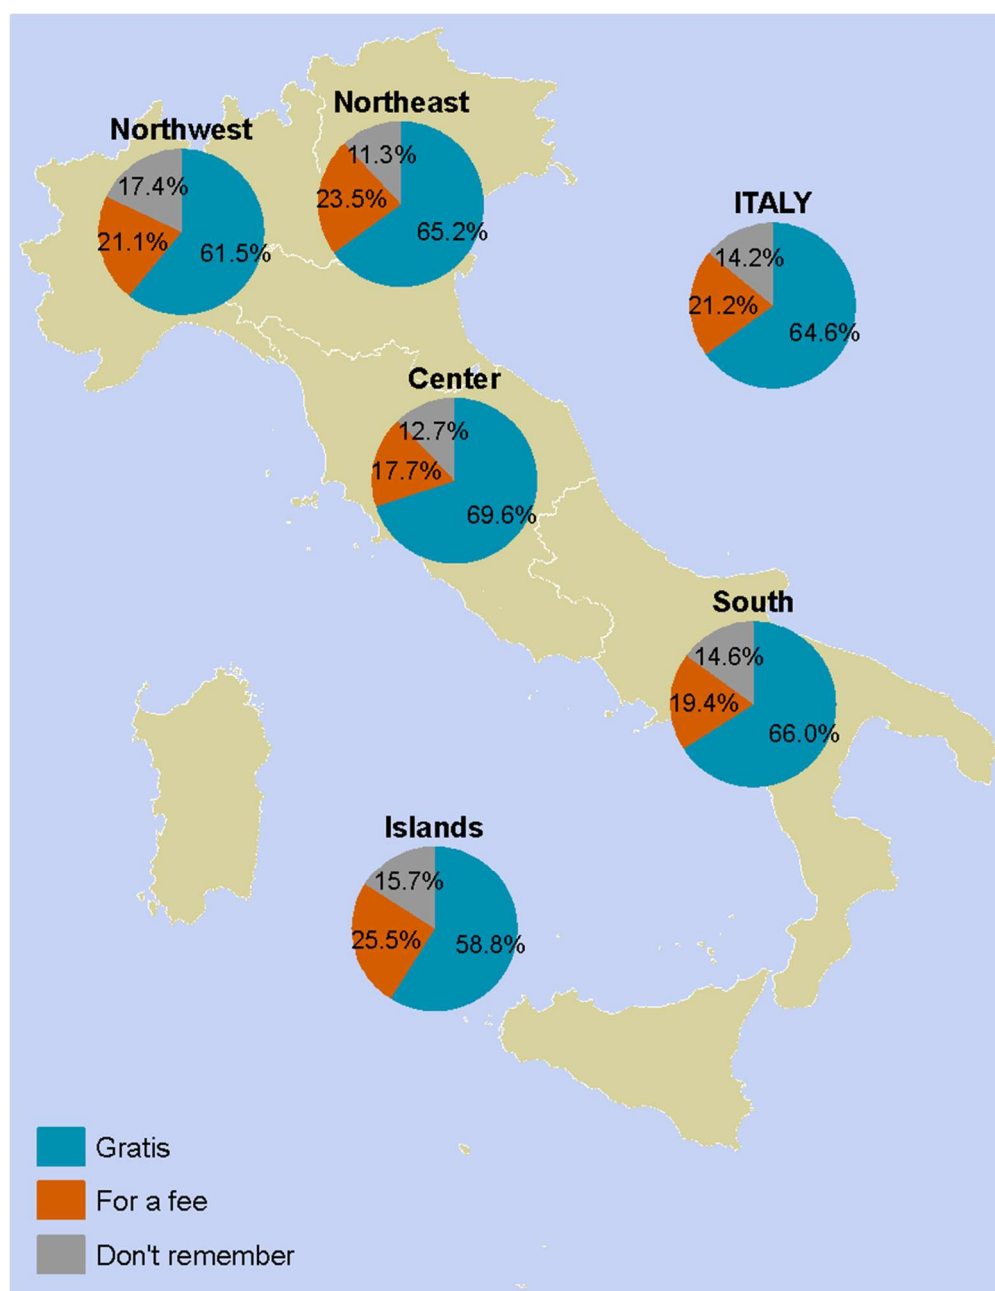

*Notes:* Females include non-binary people and participants who did not disclose their gender identity. Piedmont, Aosta Valley, Lombardy, and Liguria constitute Northwestern Italy; Trentino-South Tyrol, Veneto, Friuli-Venezia Giulia, and Emilia-Romagna constitute Northeastern Italy; Tuscany, Umbria, Marche, and Lazio constitute Central Italy; Abruzzo, Molise, Campania, Apulia, Basilicata, and Calabria constitute Southern Italy; Sicily and Sardinia constitute Insular Italy.

*HPV*, human papillomavirus; *NUTS*, Nomenclature of Territorial Units for Statistics.

**Figure S18.** Payment for HPV vaccination among male vs. female participants between 18 and 25 years of age, overall and by NUTS; only subjects vaccinated against HPV are included ( $n = 654$ ).

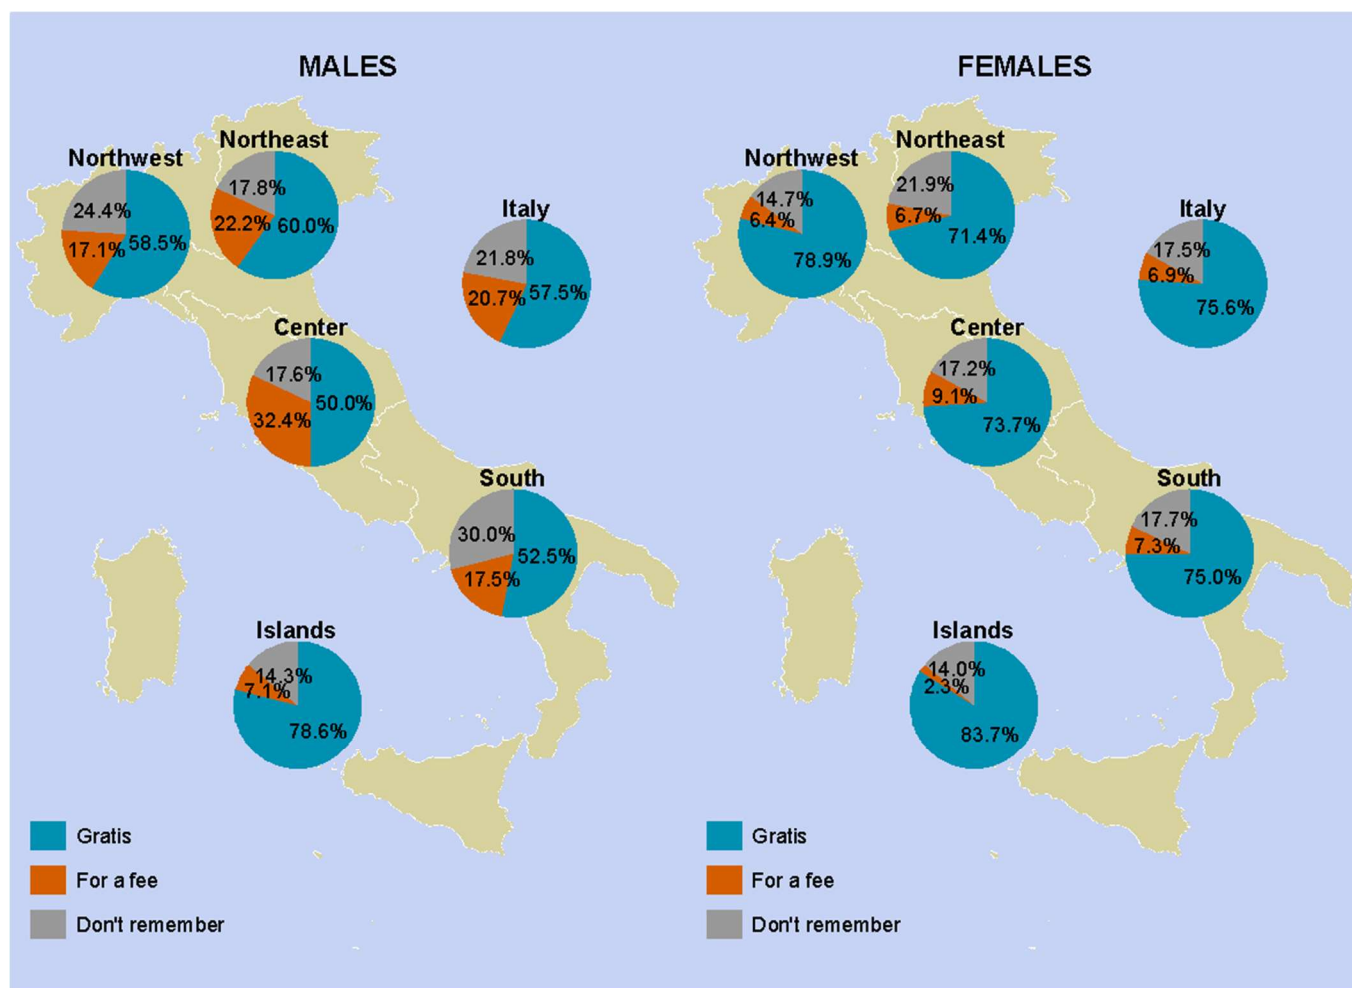

*Notes:* Females include non-binary people and participants who did not disclose their gender identity. Piedmont, Aosta Valley, Lombardy, and Liguria constitute Northwestern Italy; Trentino-South Tyrol, Veneto, Friuli-Venezia Giulia, and Emilia-Romagna constitute Northeastern Italy; Tuscany, Marche, and Lazio constitute Central Italy; Abruzzo, Molise, Campania, Apulia, Basilicata, and Calabria constitute Southern Italy; Sicily and Sardinia constitute Insular Italy.

*HPV*, human papillomavirus; *NUTS*, Nomenclature of Territorial Units for Statistics.

**Figure S19.** Payment for HPV vaccination among male vs. female offspring between 9 and 11 years of age, overall and by NUTS; only subjects vaccinated against HPV are included ( $n = 171$ ).

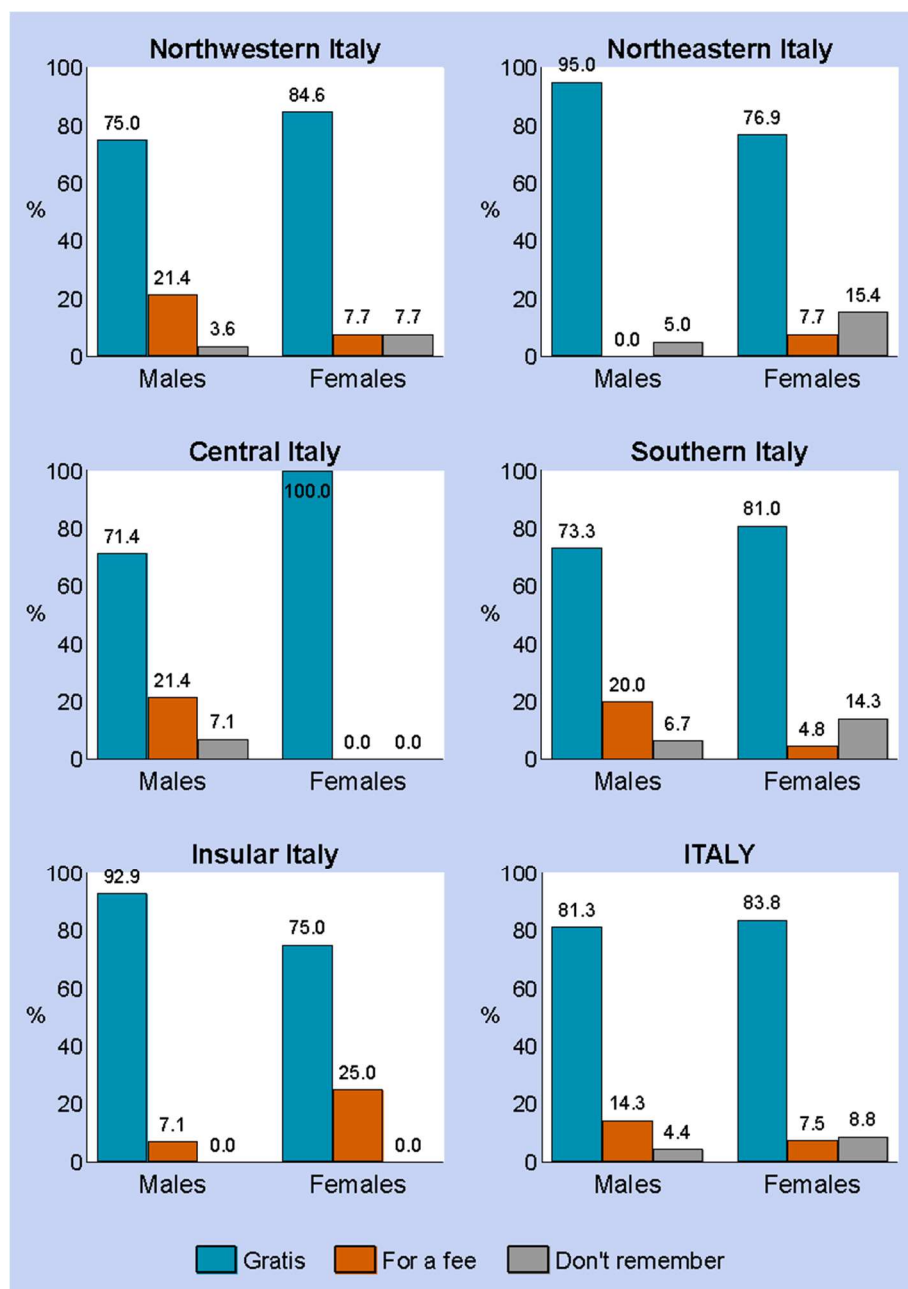

*Notes:* The presence of zero counts made it impossible to visualize the data as thematic maps using the ‘spmap’ Stata command. Information was provided by the parents of the children. Piedmont, Aosta Valley, Lombardy, and Liguria constitute Northwestern Italy; Trentino-South Tyrol, Veneto, Friuli-Venezia Giulia, and Emilia-Romagna constitute Northeastern Italy; Tuscany, Umbria, Marche, and Lazio constitute Central Italy; Abruzzo, Molise, Campania, Apulia, Basilicata, and Calabria constitute Southern Italy; Sicily and Sardinia constitute Insular Italy. *HPV*, human papillomavirus; *NUTS*, Nomenclature of Territorial Units for Statistics.

**Figure S20.** Payment for HPV vaccination among male vs. female offspring between 12 and 17 years of age, overall and by NUTS; only subjects vaccinated against HPV are included ( $n = 519$ ).

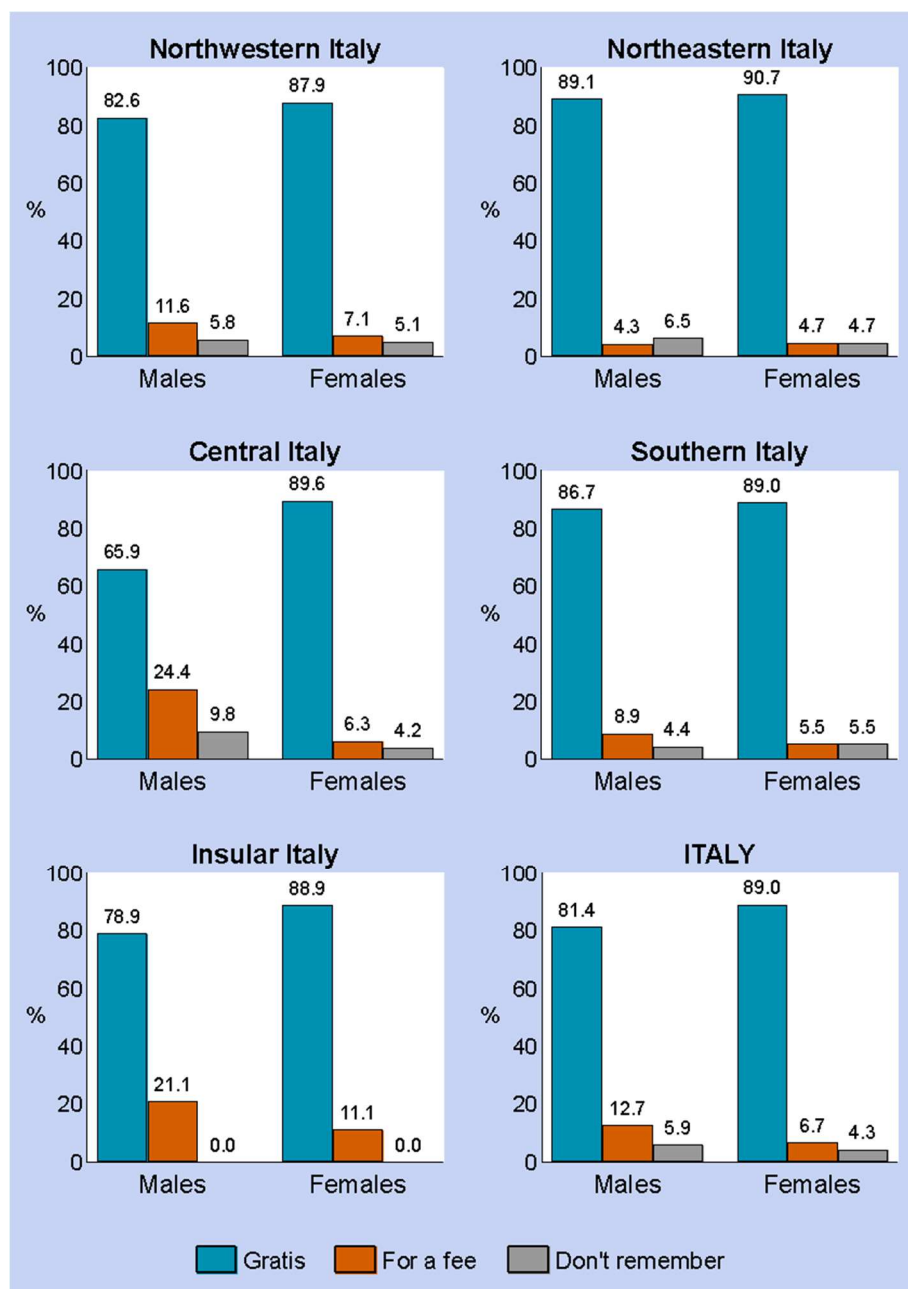

*Notes:* The presence of zero counts made it impossible to visualize the data as thematic maps using the 'spmap' Stata command. Information was provided by the parents of the children. Piedmont, Aosta Valley, Lombardy, and Liguria constitute Northwestern Italy; Trentino-South Tyrol, Veneto, Friuli-Venezia Giulia, and Emilia-Romagna constitute Northeastern Italy; Tuscany, Umbria, Marche, and Lazio constitute Central Italy; Abruzzo, Molise, Campania, Apulia, Basilicata, and Calabria constitute Southern Italy; Sicily and Sardinia constitute Insular Italy. *HPV*, human papillomavirus; *NUTS*, Nomenclature of Territorial Units for Statistics.

## **SUPPLEMENTARY MATERIAL – SURVEY TOOL**

### **1. Sex**

### **2. Year of birth**

### **3. Education level**

- Elementary/middle school
- High school
- University
- Postgraduate education

### **4. What is the postcode of the area you live in?**

### **5. Occupation**

- Student
- Doctor
- Other health worker
- Law enforcement
- Teacher
- Employed (other category than above)
- Unemployed
- Retired

### **6. Who do you live with?**

- I live alone
- I live as a couple
- I live with my family of origin
- Other

### **7. With the financial resources available to you (from your own or your family's income)**

#### **can you meet the needs of your current living situation?**

- Grade 1 (with many difficulties)
- Grade 2
- Grade 3
- Grade 4
- Grade 5 (with no difficulties)

### **8. Do you have any children?**

- Yes
- No

### **9. What is the sex of your youngest child?**

- Male
- Female

**10. Date of birth of the youngest child:**

Free field: DD/MM/YYYY

**11. Who makes decisions about vaccination of your children?**

- Mainly me
- Mainly my partner
- Evenly divided

**12. Were you pregnant at the beginning of the influenza epidemic season (October/November 2021)?**

- Yes
- No

**13. Due to a physical, psychological or sensory disability, do you have difficulties completing daily tasks such as going to the doctor or buying groceries?**

- Yes
- No

**14. Weight**

Free range: kg

**15. Height**

Free range: cm

**16. Do you have chronic respiratory diseases (i.e.: severe asthma, bronchopulmonary dysplasia, cystic fibrosis and chronic obstructive pulmonary disease-BPCO)?**

- Yes
- No

**17. Do you have any cardiovascular chronic diseases (i.e.: congenital and acquired heart disease)?**

- Yes
- No

**18. Are you diabetic?**

- Yes
- No

**19. In which of the following facilities did you have most of your vaccinations?**

- In a hospital
- In a pharmacy
- At your family doctor's

- In a vaccination hub
- At home
- At work

**20. If you could choose, in which facility/place would you prefer to receive a vaccination?**

- In a hospital
- In a pharmacy
- At your family doctor's
- In a vaccination hub
- At home
- At work

**21. How do your family and friends feel about vaccinations?**

- Grade 1 (strongly disagree)
- Grade 2
- Grade 3
- Grade 4
- Grade 5 (strongly agree)

**22. Have you had the papillomavirus vaccine (papillomavirus causes cervical/vaginal cancer, anal cancer, condylomas and other cancers)?**

- Yes
- No
- I don't know what it is

**23. Would you get an HPV shot?**

- Yes
- No

**24. How worried are you about getting the HPV infection?**

- Grade 1 (very little)
- Grade 2
- Grade 3
- Grade 4
- Grade 5 (very much)

**25. How safe do you think the HPV vaccine is?**

- Grade 1 (not very safe)
- Grade 2
- Grade 3
- Grade 4

- Grade 5 (very safe)

**26. Do you think you are entitled to the HPV vaccine?**

- Yes
- No

**27. How easy do you think it is for you to access facilities to get the HPV shot?**

- Grade 1 (with many difficulties)
- Grade 2
- Grade 3
- Grade 4
- Grade 5 (with no difficulties)

**28. How affordable do you think HPV vaccination is?**

- Grade 1 (not at all accessible)
- Grade 2
- Grade 3
- Grade 4
- Grade 5 (very accessible)

**29. Were you given the HPV vaccine free of charge or did you pay to receive it?**

- Free of charge
- Paid
